# Supplementary material
Source: PubMed Central journal article supplement (PMC9065690)
Supplement: mmc1.pdf [file mmc1.pdf]

## SUPPORTING INFORMATION

### **Use of illicit drugs, alcohol and tobacco in Spain and Portugal during the COVID-19 crisis in 2020 as measured by wastewater-based epidemiology**

Andrea Estévez-Danta<sup>1</sup>, Lubertus Bijlsma<sup>2</sup>, Ricardo Capela<sup>3,4</sup>, Rafael Cela<sup>1</sup>, Alberto Celma<sup>2</sup>, Félix Hernández<sup>2</sup>, Unax Lertxundi<sup>5</sup>, João Matias<sup>6</sup>, Rosa Montes<sup>1</sup>, Gorka Orive<sup>7,8,9,10,11</sup>, Ailette Prieto<sup>12,13</sup>, Miguel M. Santos<sup>3,4</sup>, Rosario Rodil<sup>1\*</sup>, José Benito Quintana<sup>1\*</sup>

<sup>1</sup> Department of Analytical Chemistry, Nutrition and Food Sciences, Institute of Research on Chemical and Biological Analysis (IAQBUS), Universidade de Santiago de Compostela, Constantino Candeira S/N, 15782 Santiago de Compostela, Spain

<sup>2</sup> Environmental and Public Health Analytical Chemistry, Research Institute for Pesticides and Water, University Jaume I, Avda Sos Baynat s/n, 12071, Castellón, Spain

<sup>3</sup> CIMAR/CIIMAR, Interdisciplinary Centre of Marine and Environmental Research, Group of Endocrine Disrupter and Emerging Contaminants, University of Porto, Avenida General Norton de Matos s/n, 4450-208, Matosinhos, Portugal

<sup>4</sup> FCUP-Department of Biology, Faculty of Sciences, University of Porto, Rua Do Campo Alegre, 4169-007, Porto, Portugal

<sup>5</sup> Bioaraba Health Research Institute, Osakidetza Basque Health Service, Araba Mental Health Network, Araba Psychiatric Hospital, Pharmacy Service, c/Alava 43, 01006 Vitoria-Gasteiz, Alava, Spain

<sup>6</sup> European Monitoring Centre for Drugs and Drug Addiction, 1249-289 Lisbon, Portugal

<sup>7</sup> NanoBioCel Group, Laboratory of Pharmaceutics, School of Pharmacy, University of the Basque Country UPV/EHU, Paseo de la Universidad 7, Vitoria-Gasteiz 01006, Spain

<sup>8</sup> Biomedical Research Networking Centre in Bioengineering, Biomaterials and Nanomedicine (CIBER-BBN), Vitoria-Gasteiz, Spain

<sup>9</sup> University Institute for Regenerative Medicine and Oral Implantology - UIRMI (UPV/EHU-Fundación Eduardo Anitua), Vitoria-Gasteiz, Spain

<sup>10</sup> Singapore Eye Research Institute, The Academia, 20 College Road, Discovery Tower, Singapore

<sup>11</sup> Bioaraba, NanoBioCel Research Group, Vitoria-Gasteiz, Spain

<sup>12</sup> Department of Analytical Chemistry, Faculty of Science and Technology, University of the Basque Country (UPV/EHU), Leioa, Basque Country, Spain

<sup>13</sup> Research Centre for Experimental Marine Biology and Biotechnology (PIE), University of the Basque Country (UPV/EHU), Plentzia, Basque Country, Spain

\* Corresponding authors: Rosario Rodil ([rosario.rodil@usc.es](mailto:rosario.rodil@usc.es)) and José Benito Quintana ([jb.quintana@usc.es](mailto:jb.quintana@usc.es))

## TABLE OF CONTENTS

|                                                                                                                                                                                                                                                                                                                                                                                                                                                                                     | Page |
|-------------------------------------------------------------------------------------------------------------------------------------------------------------------------------------------------------------------------------------------------------------------------------------------------------------------------------------------------------------------------------------------------------------------------------------------------------------------------------------|------|
| <b>Figure S1.</b> Amphetamine consumption in Bilbao and its metropolitan area (BIL), Vitoria-Gasteiz (VIT). The dashed line represents the mean of each different period                                                                                                                                                                                                                                                                                                            | 4    |
| <b>Figure S2.</b> MDMA consumption in Castellón (CAS), Santiago de Compostela (SAN), Bilbao and its metropolitan area (BIL), Vitoria-Gasteiz (VIT), Porto (POR) and Vila do Conde (VDC). The dashed line represents the mean of each different period                                                                                                                                                                                                                               | 5    |
| <b>Figure S3.</b> Cocaine consumption in Castellón (CAS), Santiago de Compostela (SAN), Bilbao and its metropolitan area (BIL), Vitoria-Gasteiz (VIT), Porto (POR) and Vila do Conde (VDC). The dashed line represents the mean of each different period                                                                                                                                                                                                                            | 7    |
| <b>Figure S4.</b> THC consumption in Castellón (CAS), Santiago de Compostela (SAN), Bilbao and its metropolitan area (BIL), Vitoria-Gasteiz (VIT), Porto (POR) and Vila do Conde (VDC). The dashed line represents the mean of each different period                                                                                                                                                                                                                                | 9    |
| <b>Figure S5.</b> Nicotine consumption in Castellón (CAS), Santiago de Compostela (SAN), Bilbao and its metropolitan area (BIL), Vitoria-Gasteiz (VIT), Porto (POR) and Vila do Conde (VDC). The dashed line represents the mean of each different period                                                                                                                                                                                                                           | 11   |
| <b>Figure S6.</b> Ethanol consumption in Castellón (CAS), Santiago de Compostela (SAN), Bilbao and its metropolitan area (BIL), Vitoria-Gasteiz (VIT), Porto (POR) and Vila do Conde (VDC). The dashed line represents the mean of each different period                                                                                                                                                                                                                            | 13   |
| <b>Figure S7.</b> Percent change in the sales of cigarette packs when contrasting the same months in 2020 Vs. 2019. Data from the Spanish Commission of Tobacco Market (CMT): <a href="https://www.hacienda.gob.es/es-ES/Areas%20Tematicas/CMTabacos/Paginas/hometabacos.aspx">https://www.hacienda.gob.es/es-ES/Areas%20Tematicas/CMTabacos/Paginas/hometabacos.aspx</a>                                                                                                           | 15   |
| <b>Figure S8.</b> Percent change in the estimated consumption (L) of alcoholic drinks at home when contrasting the same months in 2020 Vs. 2019. Data from the Spanish Panel of Food Consumption at Home, from the Spanish Ministry of Agriculture, Fisheries and Food: <a href="https://www.mapa.gob.es/es/alimentacion/temas/consumo-tendencias/panel-de-consumo-alimentario/">https://www.mapa.gob.es/es/alimentacion/temas/consumo-tendencias/panel-de-consumo-alimentario/</a> | 16   |
| <b>Table S1.</b> Details on WWTP samples. Sampling Mode: T means time proportional, followed by subsampling interval and volume taken per subsample. Dates presented as DD.MM.YYYY                                                                                                                                                                                                                                                                                                  | 17   |
| <b>Table S2.</b> Concentration of each compound in the wastewater samples. MDL: method detection limit                                                                                                                                                                                                                                                                                                                                                                              | 20   |
| <b>Table S3.</b> Excretion loads calculated from the concentrations measured in wastewater (Table S2) after considering WWTP flow data (Table S1)                                                                                                                                                                                                                                                                                                                                   | 26   |
| <b>Table S4.</b> Human consumption calculated from the excretion loads (Table S3) after considering the corresponding CFs. THC: tetrahydrocannabinol, NIC: Nicotine                                                                                                                                                                                                                                                                                                                 | 32   |
| <b>Table S5.</b> Enantiomeric fractions (EF <sub>R</sub> ) determined in the wastewater samples                                                                                                                                                                                                                                                                                                                                                                                     | 39   |
| <b>Table S6.</b> Summary of the statistical significance of the time-period on the evolution of consumption in the different cities. Statistical comparison was first performed by a Kruskal-Wallis test and in case of statistical differences being found, subjected to a Bonferroni post-hoc analysis ( $\alpha= 0.05$ ).                                                                                                                                                        | 40   |

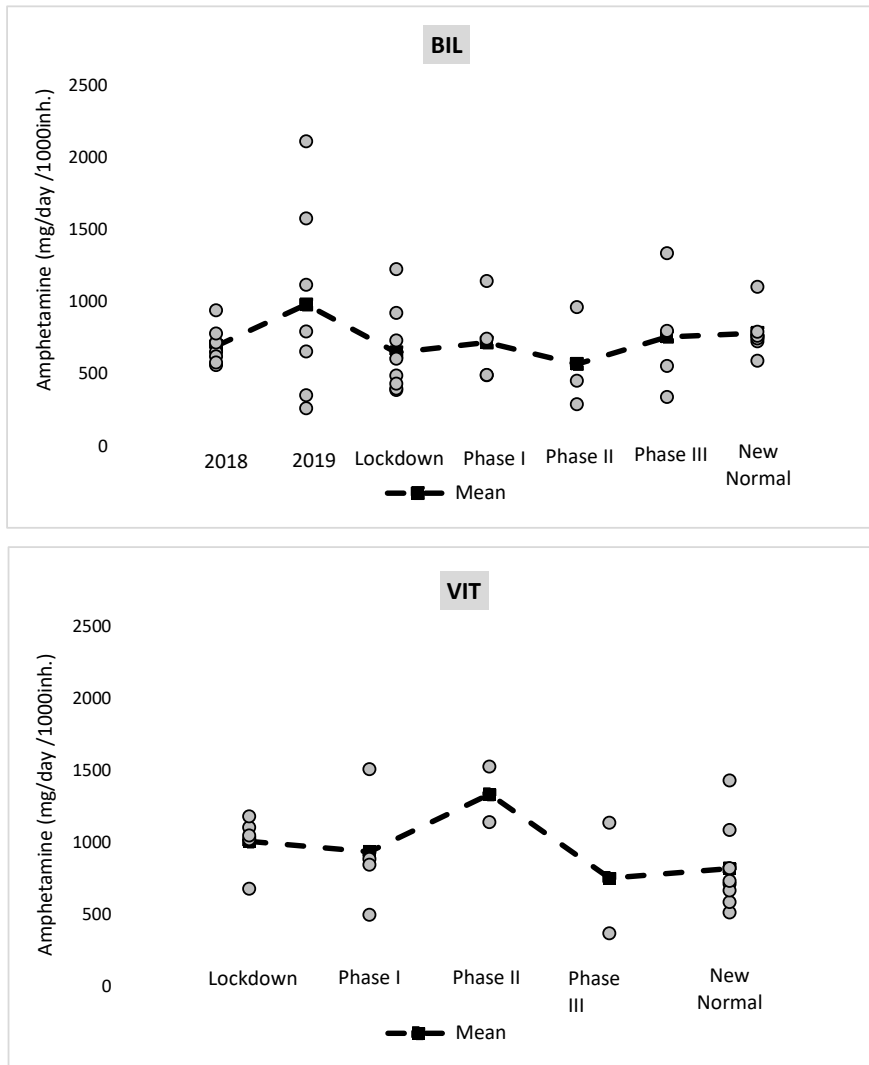

**Figure S1.** Amphetamine consumption in Bilbao and its metropolitan area (BIL), Vitoria-Gasteiz (VIT). The dashed line represents the mean of each different period.

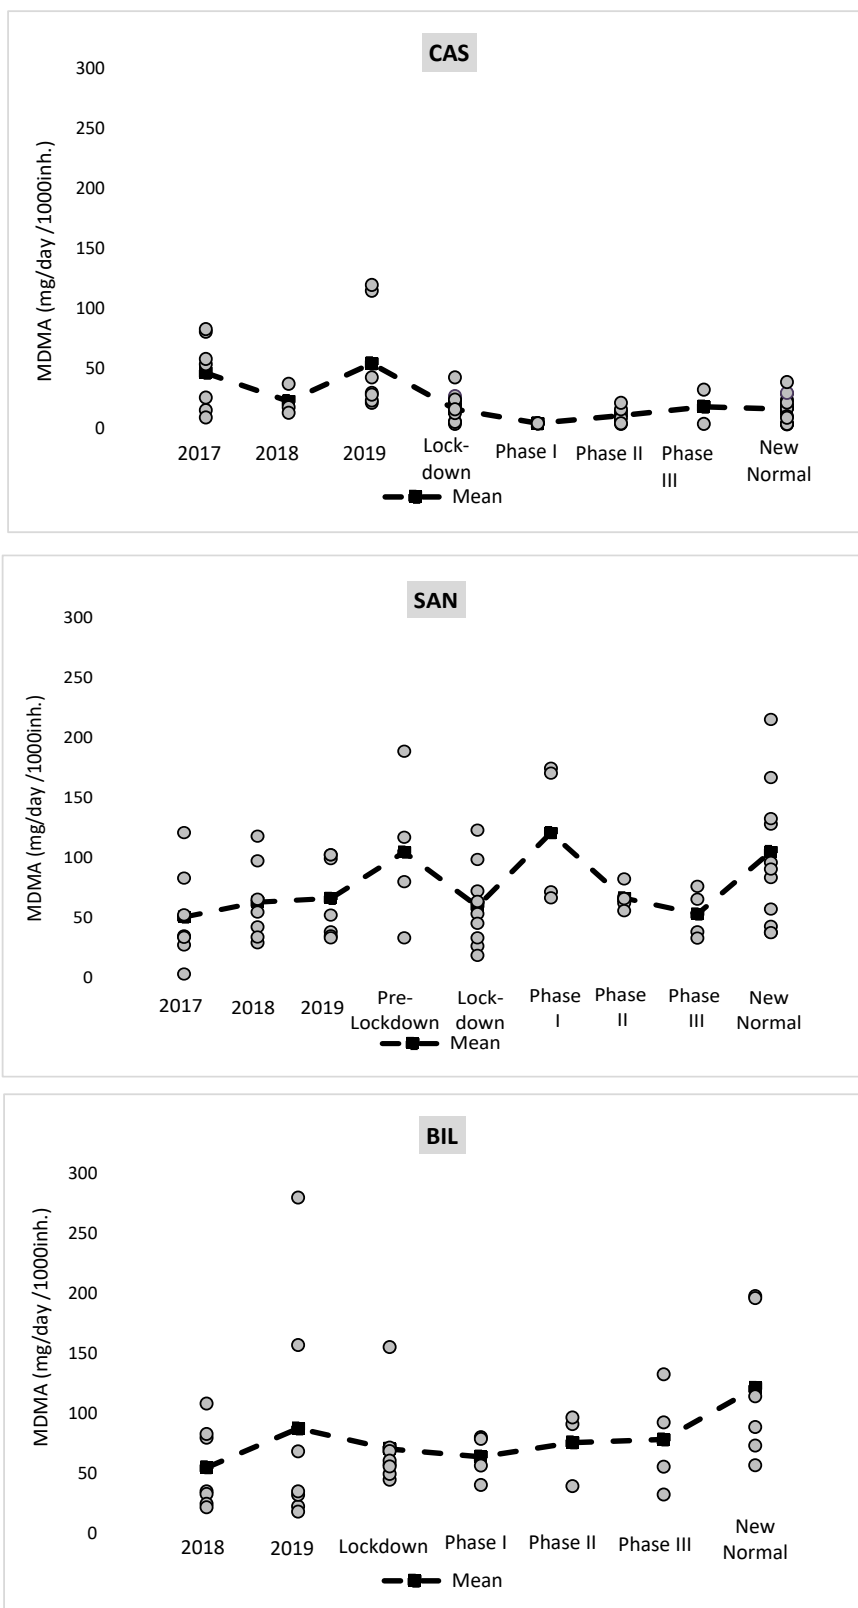

**Figure S2.** MDMA consumption in Castellón (CAS), Santiago de Compostela (SAN), Bilbao and its metropolitan area (BIL), Vitoria-Gasteiz (VIT), Porto (POR) and Vila do Conde (VDC). The dashed line represents the mean of each different period.

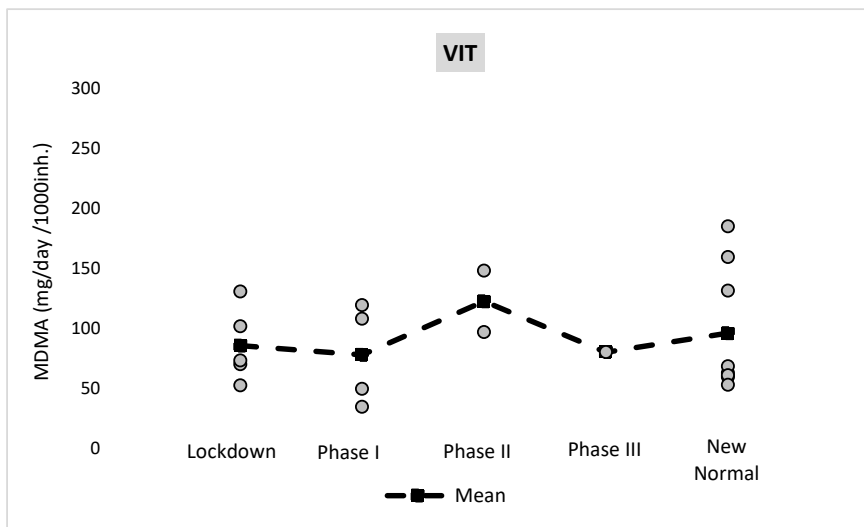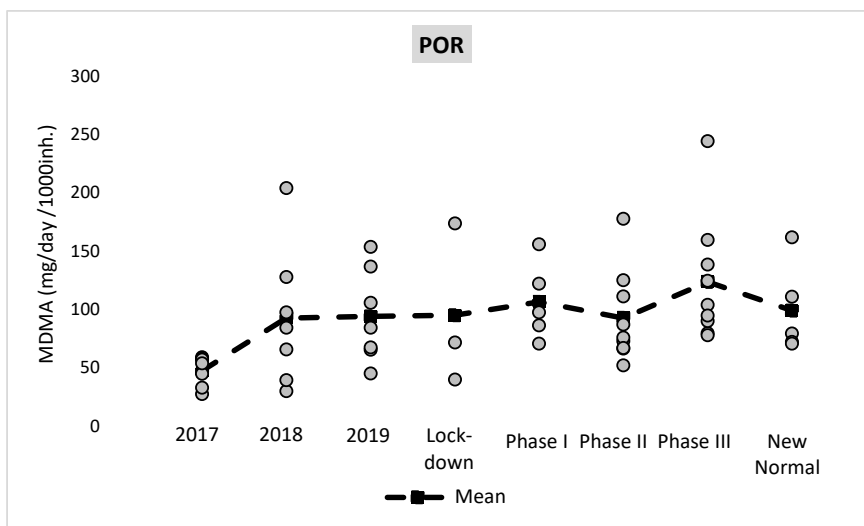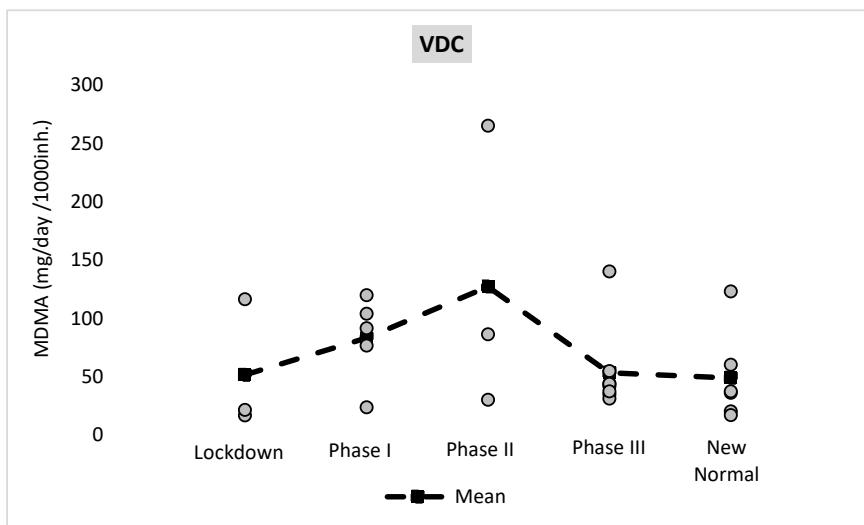

**Figure S2 (Cont.)** MDMA consumption in Castellón (CAS), Santiago de Compostela (SAN), Bilbao and its metropolitan area (BIL), Vitoria-Gasteiz (VIT), Porto (POR) and Vila do Conde (VDC). The dashed line represents the mean of each different period.

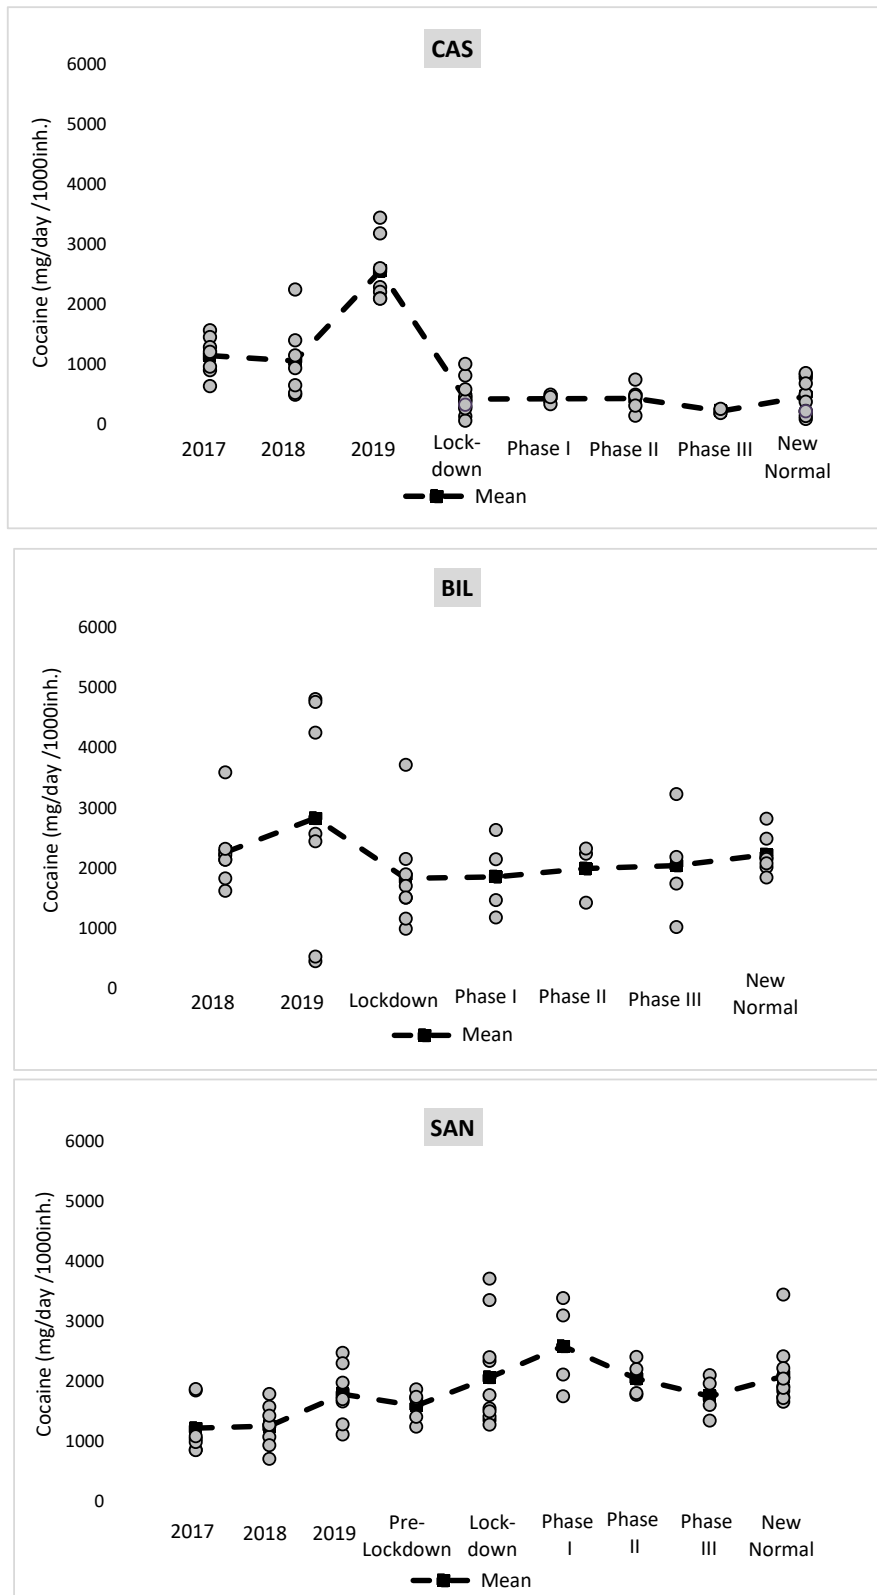

**Figure S3.** Cocaine consumption in Castellón (CAS), Santiago de Compostela (SAN), Bilbao and its metropolitan area (BIL), Vitoria-Gasteiz (VIT), Porto (POR) and Vila do Conde (VDC). The dashed line represents the mean of each different period.

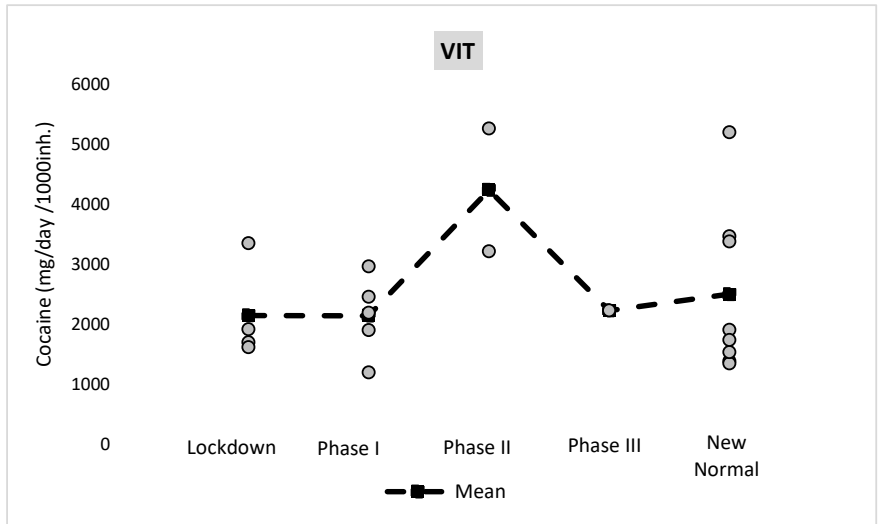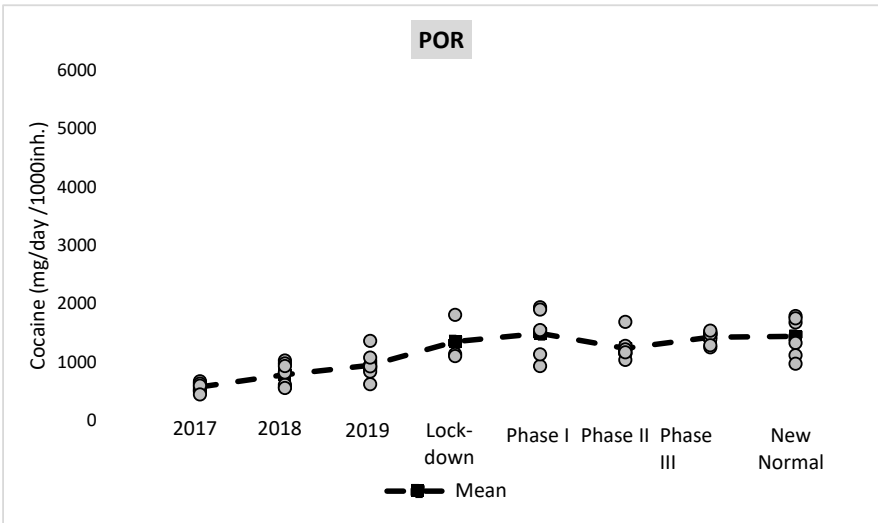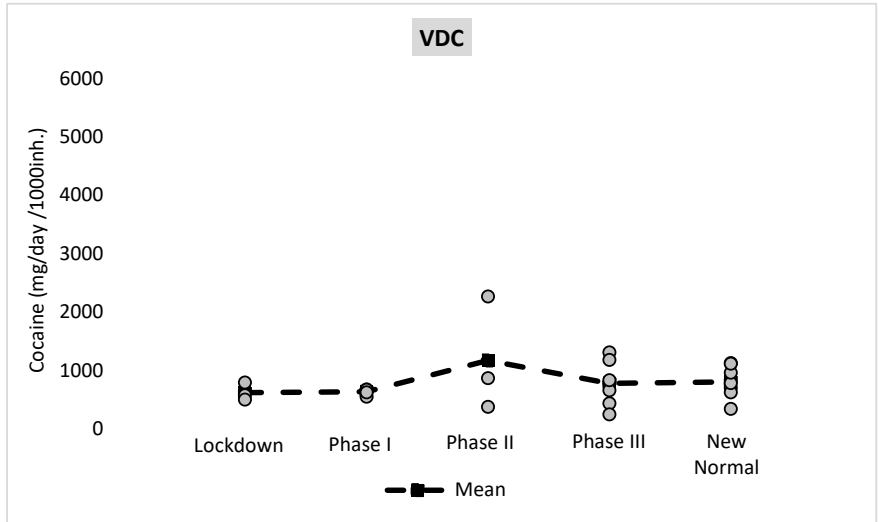

**Figure S3 (Cont.)** Cocaine consumption in Castellón (CAS), Santiago de Compostela (SAN), Bilbao and its metropolitan area (BIL), Vitoria-Gasteiz (VIT), Porto (POR) and Vila do Conde (VDC). The dashed line represents the mean of each different period.



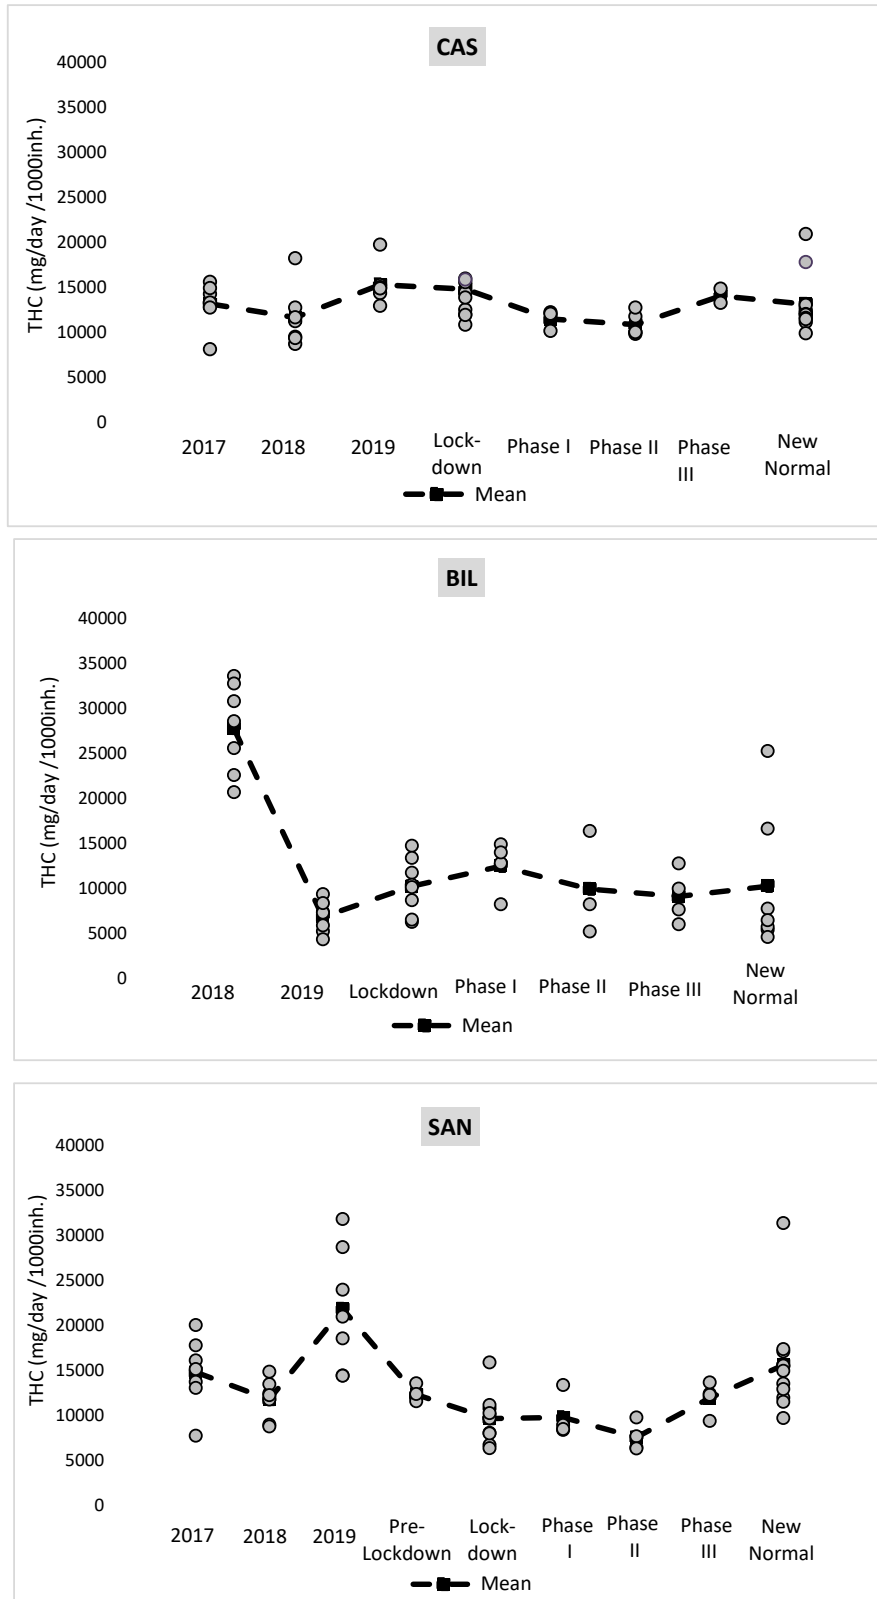

**Figure S4.** THC consumption in Castellón (CAS), Santiago de Compostela (SAN), Bilbao and its metropolitan area (BIL), Vitoria-Gasteiz (VIT), Porto (POR) and Vila do Conde (VDC). The dashed line represents the mean of each different period.

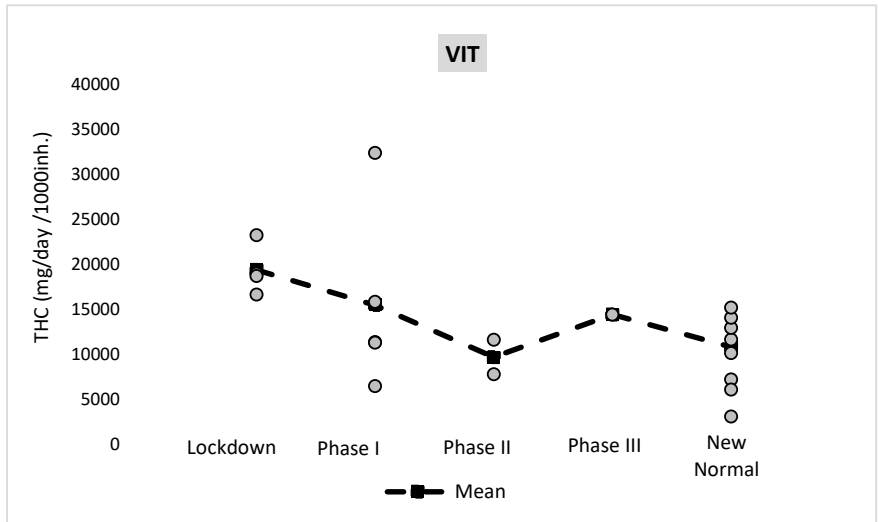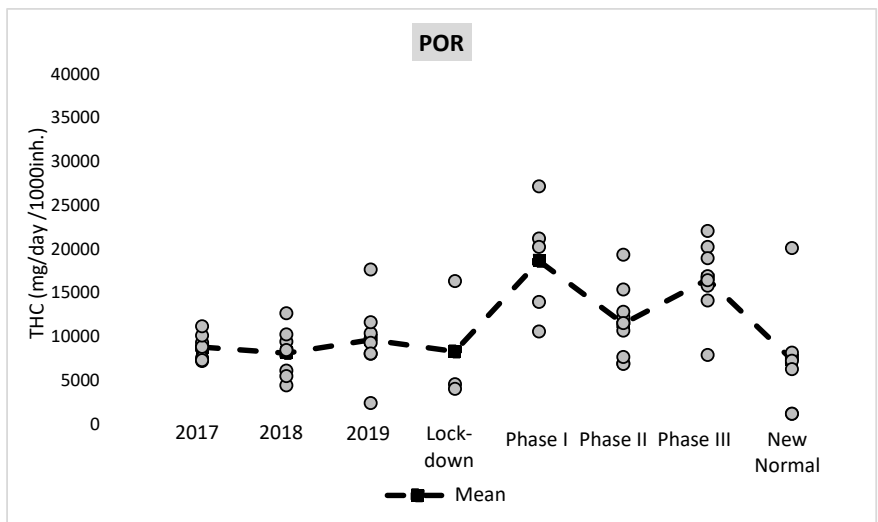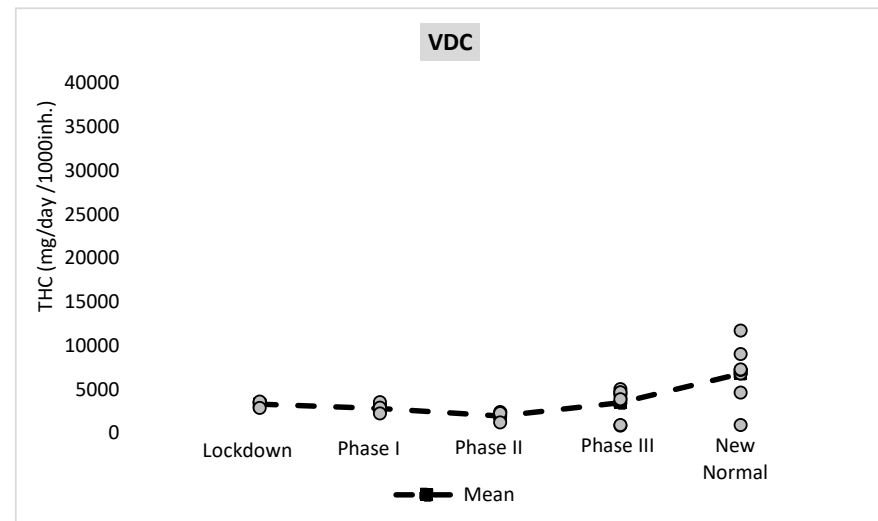

**Figure S4 (Cont.)** THC consumption in Castellón (CAS), Santiago de Compostela (SAN), Bilbao and its metropolitan area (BIL), Vitoria-Gasteiz (VIT), Porto (POR) and Vila do Conde (VDC). The dashed line represents the mean of each different period.

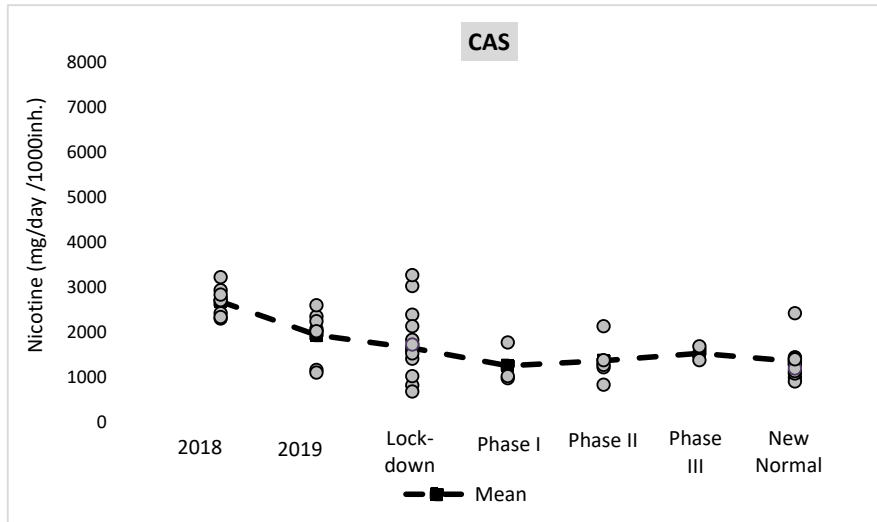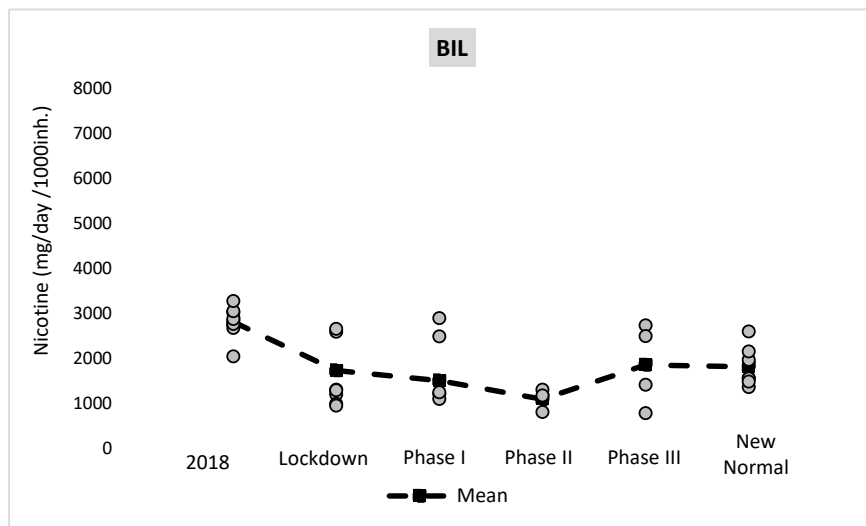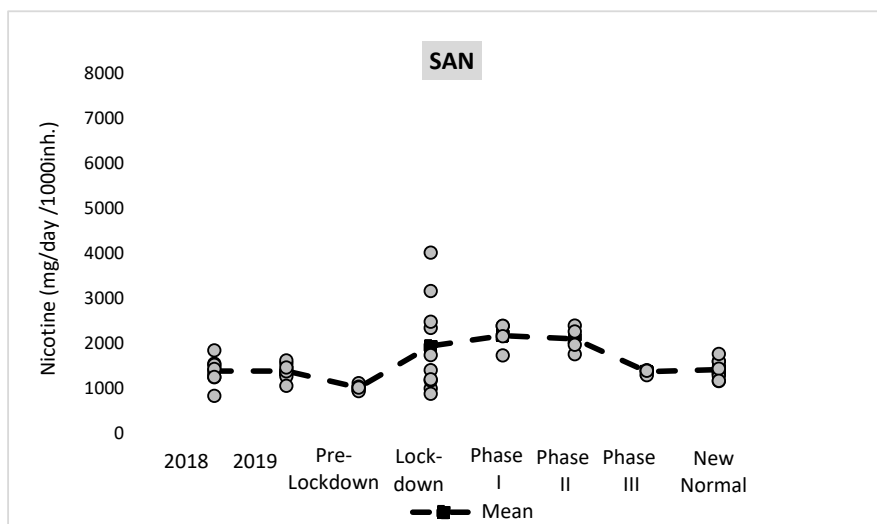

**Figure S5.** Nicotine consumption in Castellón (CAS), Santiago de Compostela (SAN), Bilbao and its metropolitan area (BIL), Vitoria-Gasteiz (VIT), Porto (POR) and Vila do Conde (VDC). The dashed line represents the mean of each different period.

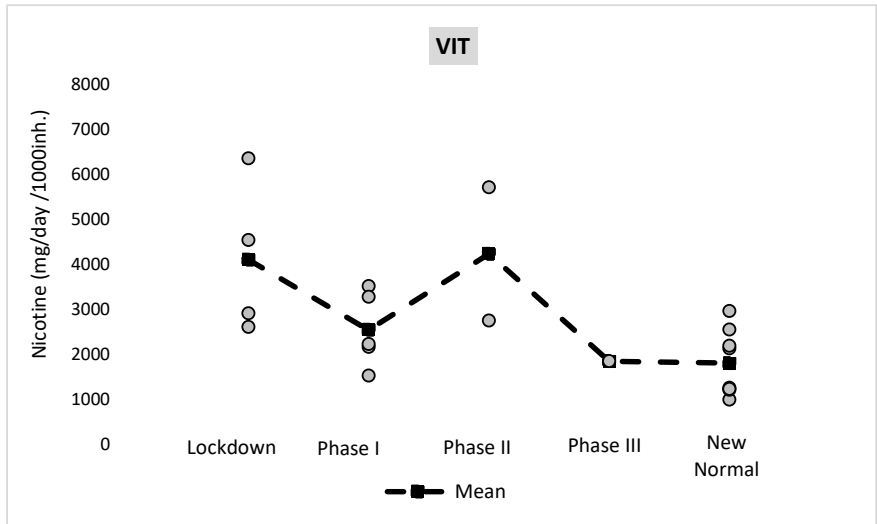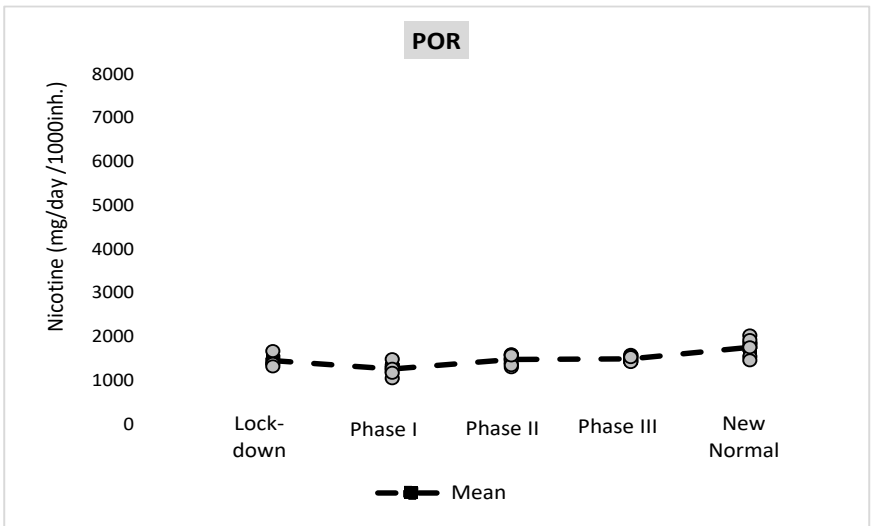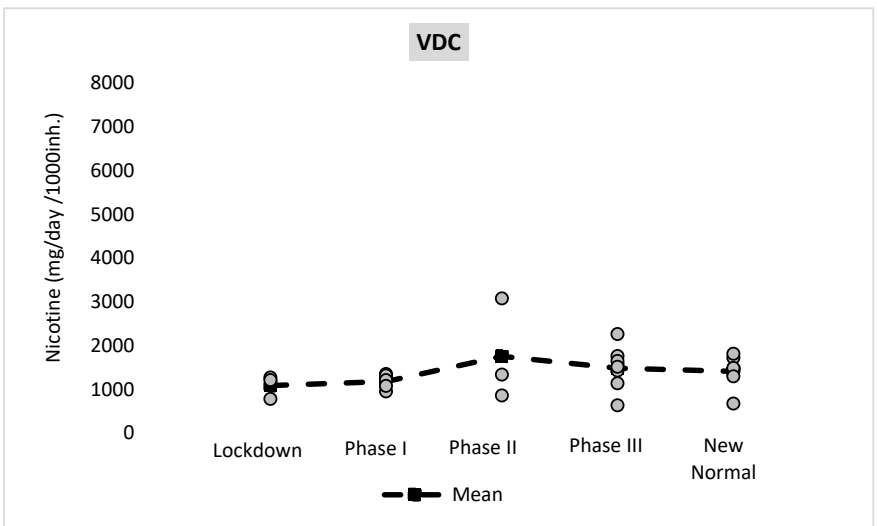

**Figure S5 (Cont.)** Nicotine consumption in Castellón (CAS), Santiago de Compostela (SAN), Bilbao and its metropolitan area (BIL), Vitoria-Gasteiz (VIT), Porto (POR) and Vila do Conde (VDC). The dashed line represents the mean of each different period.

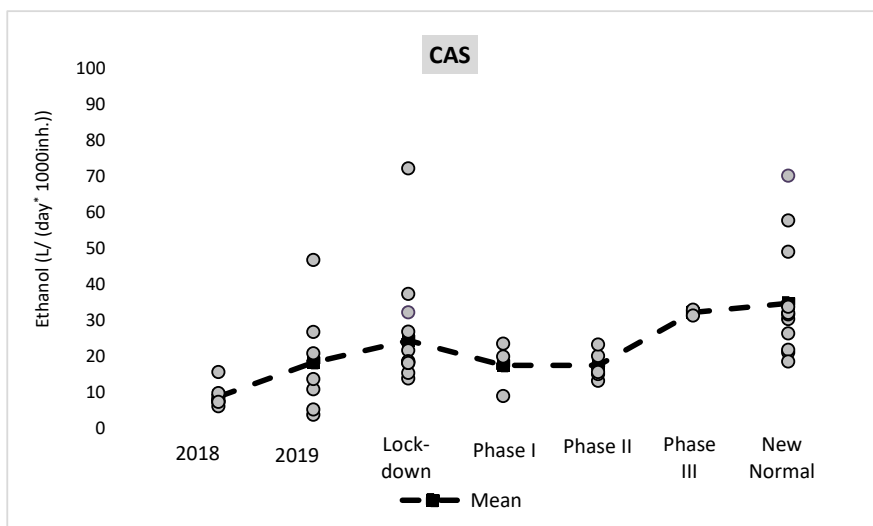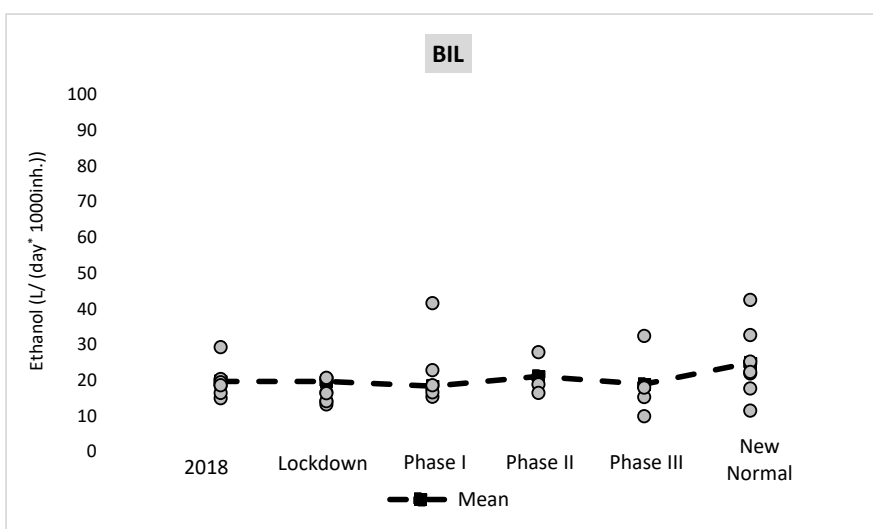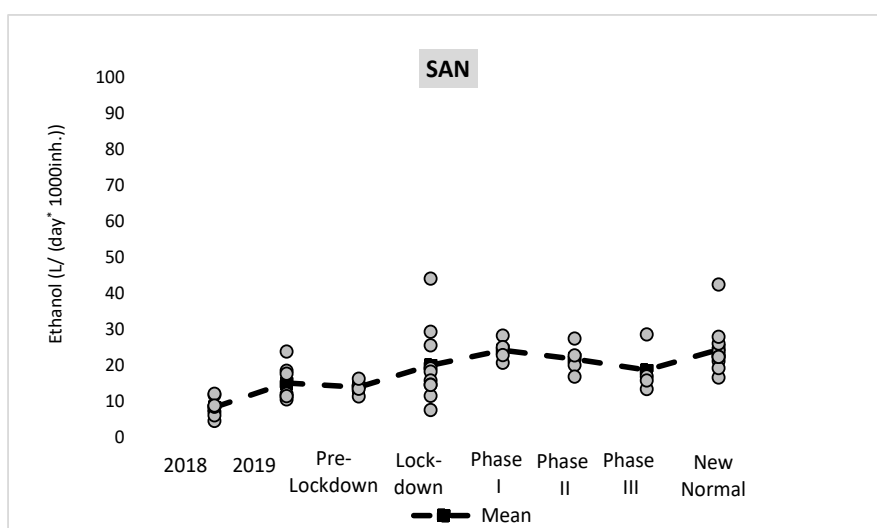

**Figure S6.** Ethanol consumption in Castellón (CAS), Santiago de Compostela (SAN), Bilbao and its metropolitan area (BIL), Vitoria-Gasteiz (VIT), Porto (POR) and Vila do Conde (VDC). The dashed line represents the mean of each different period.

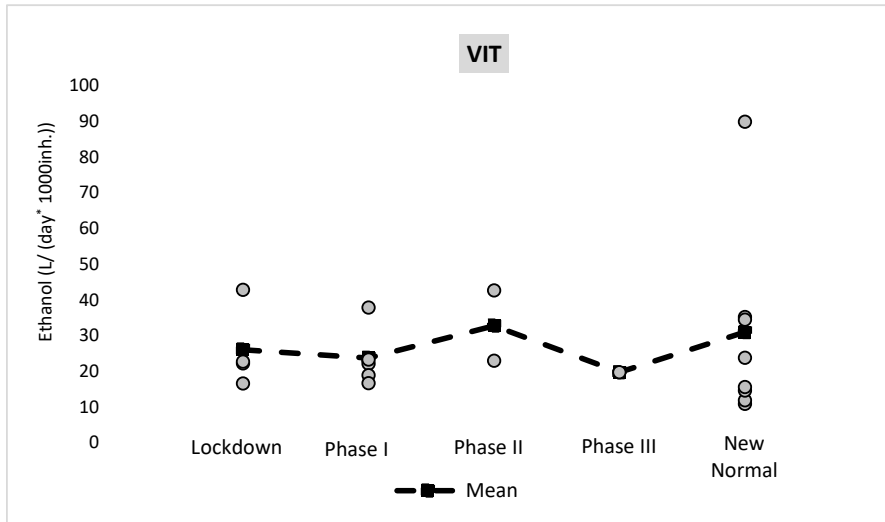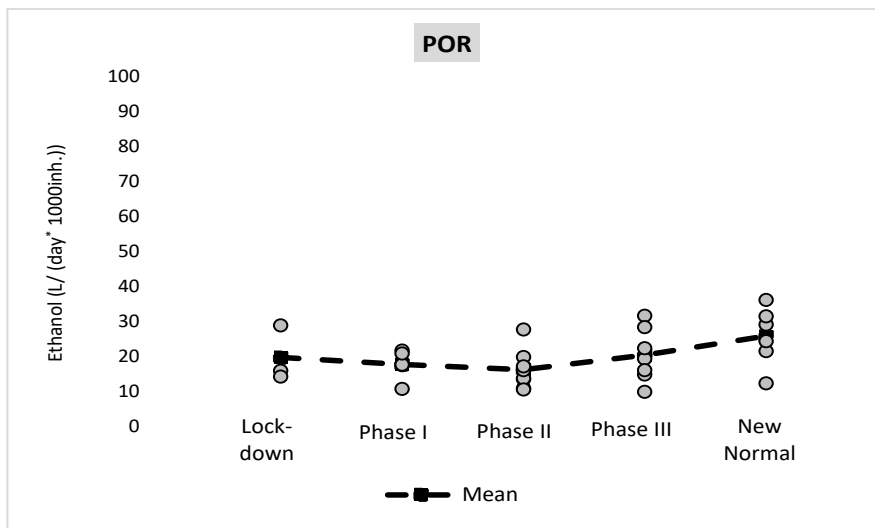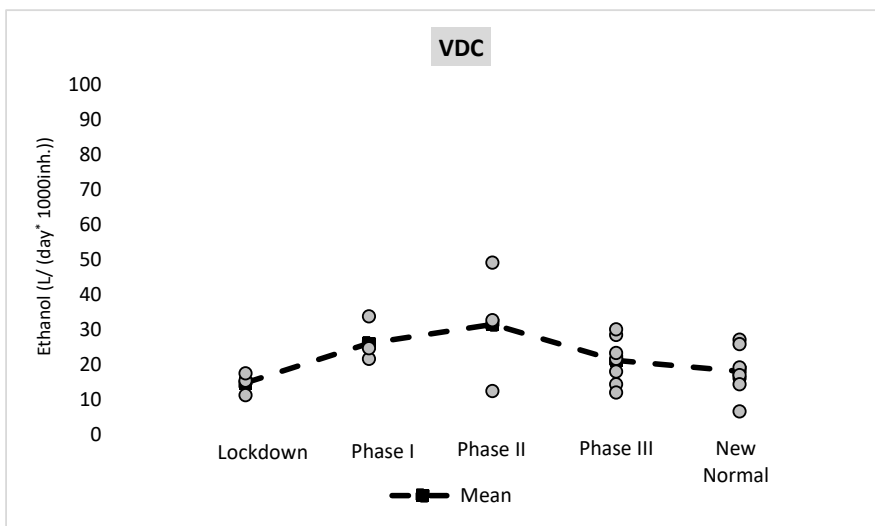

**Figure S6 (Cont.)** Ethanol consumption in Castellón (CAS), Santiago de Compostela (SAN), Bilbao and its metropolitan area (BIL), Vitoria-Gasteiz (VIT), Porto (POR) and Vila do Conde (VDC). The dashed line represents the mean of each different period.

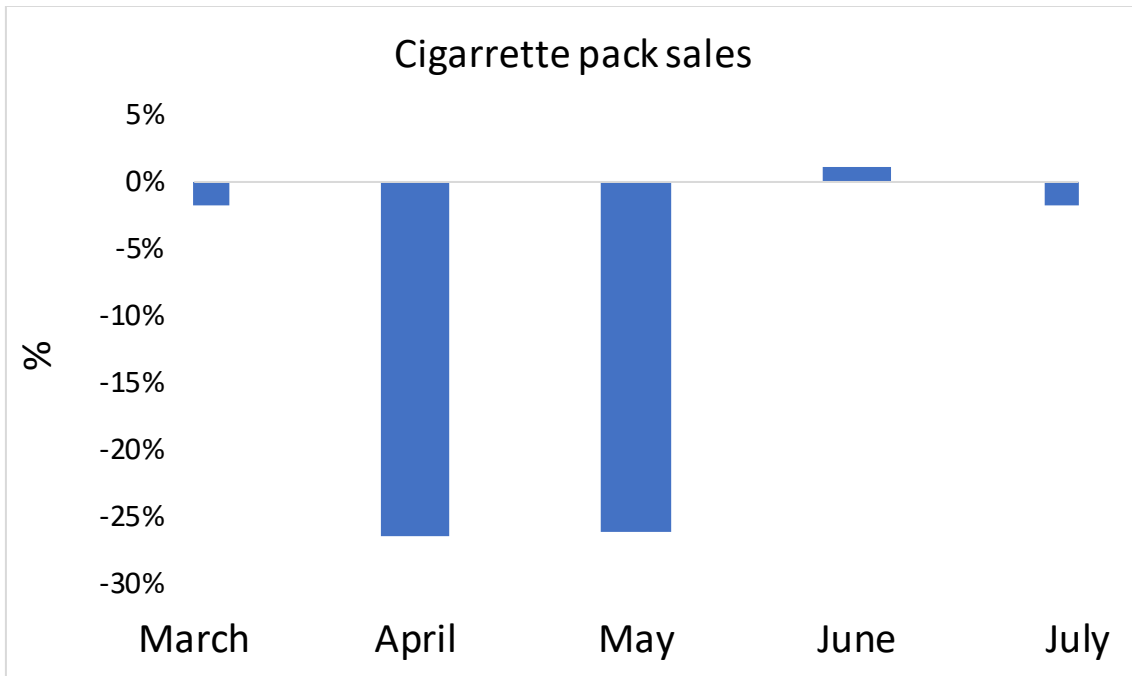

**Figure S7.** Percent change in the sales of cigarette packs when contrasting the same months in 2020 Vs. 2019. Data from the Spanish Commission of Tobacco Market (CMT): <https://www.hacienda.gob.es/es-ES/Areas%20Tematicas/CMTabacos/Paginas/hometabacos.aspx>.

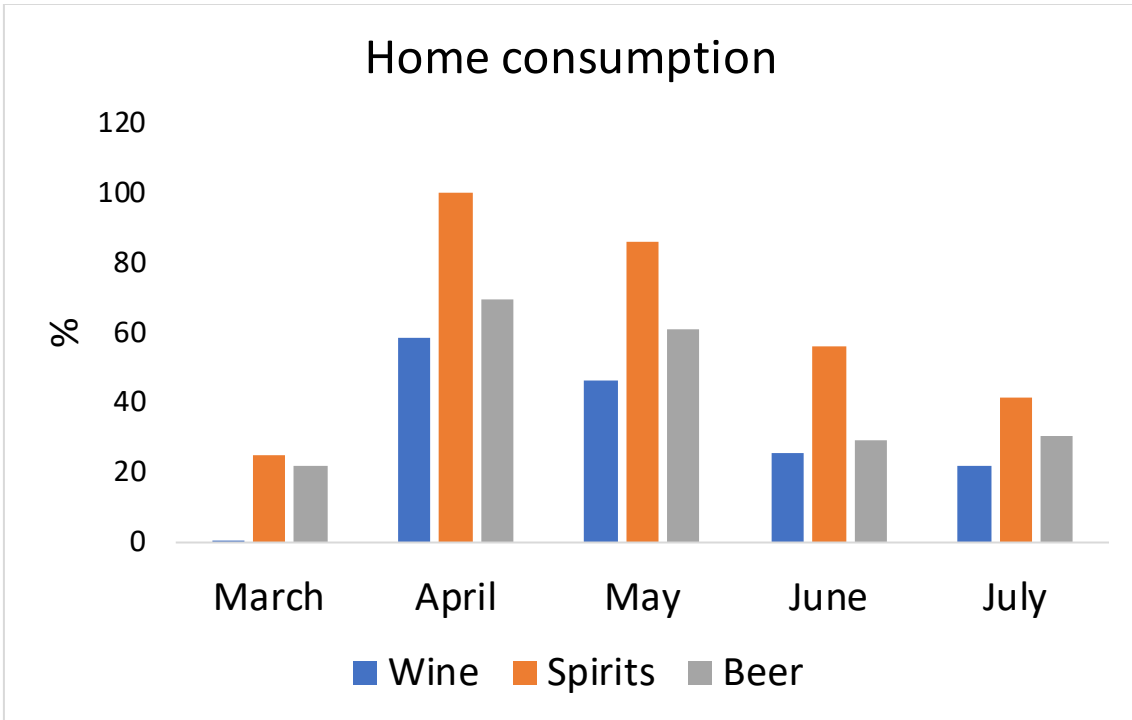

**Figure S8.** Percent change in the estimated consumption (L) of alcoholic drinks at home when contrasting the same months in 2020 Vs. 2019. Data from the Spanish Panel of Food Consumption at Home, from the Spanish Ministry of Agriculture, Fisheries and Food: <https://www.mapa.gob.es/es/alimentacion/temas/consumo-tendencias/panel-de-consumo-alimentario/>



**Table S1.** Details on WWTP samples. Sampling Mode: T means time proportional, followed by subsampling interval and volume taken per subsample. Dates presented as DD.MM.YYYY.

| Country                  | Spain                            |                                             |                       |                                             |                        |                                             | Portugal             |                                             |                      |                                             |                      |                                             |
|--------------------------|----------------------------------|---------------------------------------------|-----------------------|---------------------------------------------|------------------------|---------------------------------------------|----------------------|---------------------------------------------|----------------------|---------------------------------------------|----------------------|---------------------------------------------|
|                          | Bilbao and its metropolitan area |                                             | Castellón             |                                             | Santiago de Compostela |                                             | Vitoria-Gasteiz      |                                             | Porto                |                                             | Vila do Conde        |                                             |
| <b>WWTP name</b>         | Galindo                          |                                             | Castellón de la Plana |                                             | Silvouta               |                                             | Crispiana            |                                             | Sobreiras            |                                             | Ave                  |                                             |
| <b>Population served</b> | 860,237                          |                                             | 179,661               |                                             | 136,500                |                                             | 255,052              |                                             | 150,000              |                                             | 80,000               |                                             |
| <b>Sampling mode</b>     | T: 60 min, 100 mL                |                                             | T: 15 min, 100 mL     |                                             | T: 60 min, 600 mL *    |                                             | T: 60 min, 200 mL    |                                             | T: 15 min, 125 mL    |                                             | T: 15 min, 125 mL    |                                             |
| <b>Sampling details</b>  | <b>Sampling date</b>             | <b>Flow (m<sup>3</sup>day<sup>-1</sup>)</b> | <b>Sampling date</b>  | <b>Flow (m<sup>3</sup>day<sup>-1</sup>)</b> | <b>Sampling date</b>   | <b>Flow (m<sup>3</sup>day<sup>-1</sup>)</b> | <b>Sampling date</b> | <b>Flow (m<sup>3</sup>day<sup>-1</sup>)</b> | <b>Sampling date</b> | <b>Flow (m<sup>3</sup>day<sup>-1</sup>)</b> | <b>Sampling date</b> | <b>Flow (m<sup>3</sup>day<sup>-1</sup>)</b> |
|                          | 12.06.2019                       | 191603                                      | 10.04.2019            | 38065                                       | 21.05.2019*            | 47188                                       |                      |                                             |                      |                                             |                      |                                             |
|                          | 13.06.2019                       | 181234                                      | 11.04.2019            | 37318                                       | 22.05.2019*            | 48858                                       |                      |                                             |                      |                                             |                      |                                             |
|                          | 14.06.2019                       | 157339                                      | 12.04.2019            | 38219                                       | 24.05.2019*            | 44786                                       |                      |                                             |                      |                                             |                      |                                             |
|                          | 15.06.2019                       | 161906                                      | 13.04.2019            | 37788                                       | 25.05.2019*            | 46072                                       |                      |                                             |                      |                                             |                      |                                             |
|                          | 16.06.2019                       | 176885                                      | 14.04.2019            | 37530                                       | 26.05.2019*            | 45045                                       |                      |                                             |                      |                                             |                      |                                             |
|                          | 17.06.2019                       | 180991                                      | 15.04.2019            | 36590                                       | 27.05.2019*            | 44514                                       |                      |                                             |                      |                                             |                      |                                             |
|                          | 18.06.2019                       | 181426                                      | 16.04.2019            | 37743                                       | 28.05.2019*            | 47630                                       |                      |                                             |                      |                                             |                      |                                             |
|                          | 12.06.2019                       | 191603                                      | 10.04.2019            | 38065                                       | 21.05.2019*            | 47188                                       |                      |                                             |                      |                                             |                      |                                             |
|                          | 13.04.2020                       | 206554                                      | 26.03.2020            | 41991                                       | 10.03.2020*            | 54450                                       | 28.04.2020           | 138300                                      | 19.04.2020           | 30900                                       | 22.04.2020           | 14354.4                                     |
|                          | 15.04.2020                       | 161108                                      | 27.03.2020            | 40642                                       | 11.03.2020*            | 52994                                       | 29.04.2020           | 109900                                      | 22.04.2020           | 32286                                       | 26.04.2020           | 13178.4                                     |
|                          | 19.04.2020                       | 217790                                      | 28.03.2020            | 38283                                       | 12.03.2020*            | 53487                                       | 04.05.2020           | 108900                                      | 30.04.2020           | 31941                                       | 29.04.2020           | 14697.4                                     |
|                          | 22.04.2020                       | 228370                                      | 29.03.2020            | 35650                                       | 13.03.2020*            | 52696                                       | 07.05.2020           | 89400                                       | 03.05.2020           | 30473                                       | 03.05.2020           | 13161.47                                    |
|                          | 26.04.2020                       | 193556                                      | 30.03.2020            | 36529                                       | 14.03.2020*            | 51804                                       | 11.05.2020           | 191600                                      | 06.05.2020           | 32546                                       | 06.05.2020           | 16230.97                                    |
|                          | 03.05.2020                       | 165978                                      | 31.03.2020            | 53317                                       | 07.04.2020             | 52322                                       | 14.05.2020           | 144600                                      | 10.05.2020           | 32717                                       | 10.05.2020           | 14331.97                                    |
|                          | 06.05.2020                       | 177716                                      | 01.04.2020            | 50862                                       | 13.04.2020             | 49966                                       | 18.05.2020           | 104160                                      | 13.05.2020           | 32490                                       | 13.05.2020           | 15643.97                                    |
|                          | 10.05.2020                       | 366517                                      | 05.04.2020            | 40075                                       | 14.04.2020             | 50722                                       | 21.05.2020           | 95808                                       | 17.05.2020           | 30130                                       | 17.05.2020           | 13317.97                                    |
|                          | 13.05.2020                       | 243257                                      | 08.04.2020            | 39721                                       | 19.04.2020             | 52549                                       | 25.05.2020           | 83328                                       | 19.05.2020           | 33110                                       | 20.05.2020           | 11243.97                                    |
|                          | 17.05.2020                       | 157746                                      | 13.04.2020            | 39621                                       | 21.04.2020             | 54006                                       | 01.06.2020           | 75744                                       | 20.05.2020           | 32320                                       | 24.05.2020           | 14305.97                                    |
| 20.05.2020               | 167911                           | 16.04.2020                                  | 44040                 | 25.04.2020                                  | 50577                  | 08.06.2020                                  | 81120                | 21.05.2020                                  | 33650                | 31.05.2020                                  | 17762.97             |                                             |

Sampling details

| Sampling date | Flow (m <sup>3</sup> day <sup>-1</sup> ) | Sampling date | Flow (m <sup>3</sup> day <sup>-1</sup> ) | Sampling date | Flow (m <sup>3</sup> day <sup>-1</sup> ) | Sampling date | Flow (m <sup>3</sup> day <sup>-1</sup> ) | Sampling date | Flow (m <sup>3</sup> day <sup>-1</sup> ) | Sampling date | Flow (m <sup>3</sup> day <sup>-1</sup> ) |
|---------------|------------------------------------------|---------------|------------------------------------------|---------------|------------------------------------------|---------------|------------------------------------------|---------------|------------------------------------------|---------------|------------------------------------------|
| 24.05.2020    | 184423                                   | 19.04.2020    | 41374                                    | 03.05.2020    | 58126                                    | 15.06.2020    | 77760                                    | 22.05.2020    | 33430                                    | 03.06.2020    | 16548.43                                 |
| 31.05.2020    | 153090                                   | 23.04.2020    | 41165                                    | 04.05.2020    | 57060                                    | 22.06.2020    | 76224                                    | 23.05.2020    | 31880                                    | 07.06.2020    | 12745.43                                 |
| 03.06.2020    | 155421                                   | 27.04.2020    | 34479                                    | 05.05.2020    | 55260                                    | 29.06.2020    | 68928                                    | 24.05.2020    | 30890                                    | 14.06.2020    | 18516.43                                 |
| 07.06.2020    | 285673                                   | 29.04.2020    | 42244                                    | 10.05.2020    | 51819                                    | 07.07.2020    | 66144                                    | 25.05.2020    | 33350                                    | 17.06.2020    | 13709.43                                 |
| 10.06.2020    | 127238                                   | 04.05.2020    | 46270                                    | 12.05.2020    | 53168                                    | 08.07.2020    | 71136                                    | 27.05.2020    | 33360                                    | 21.06.2020    | 14436.43                                 |
| 14.06.2020    | 168674                                   | 07.05.2020    | 39013                                    | 17.05.2020    | 51031                                    | 09.07.2020    | 70272                                    | 31.05.2020    | 29840                                    | 23.06.2020    | 14128.43                                 |
| 17.06.2020    | 187195                                   | 11.05.2020    | 41112                                    | 19.05.2020    | 49184                                    | 10.07.2020    | 67680                                    | 03.06.2020    | 33510                                    | 28.06.2020    | 12794.43                                 |
| 21.06.2020    | 155423                                   | 14.05.2020    | 40871                                    | 24.05.2020    | 48156                                    | 11.07.2020    | 62016                                    | 07.06.2020    | 28860                                    | 01.07.2020    | 13735.95                                 |
| 24.06.2020    | 163593                                   | 18.05.2020    | 41452                                    | 27.05.2020    | 46653                                    | 12.07.2020    | 115392                                   | 11.06.2020    | 29160                                    | 05.07.2020    | 13493.28                                 |
| 28.06.2020    | 142925                                   | 21.05.2020    | 40931                                    | 30.05.2020    | 45574                                    | 13.07.2020    | 73440                                    | 14.06.2020    | 28000                                    | 08.07.2020    | 14211.45                                 |
| 01.07.2020    | 198787                                   | 25.05.2020    | 40571                                    | 02.06.2020    | 46139                                    |               |                                          | 17.06.2020    | 33120                                    | 09.07.2020    | 14050.45                                 |
| 08.07.2020    | 182312                                   | 28.05.2020    | 36849                                    | 07.06.2020    | 43619                                    |               |                                          | 21.06.2020    | 29720                                    | 10.07.2020    | 15314.45                                 |
| 09.07.2020    | 152026                                   | 01.06.2020    | 32910                                    | 09.06.2020    | 42528                                    |               |                                          | 24.06.2020    | 29940                                    | 11.07.2020    | 14347.95                                 |
| 12.07.2020    | 287868                                   | 04.06.2020    | 33096                                    | 13.06.2020    | 46169                                    |               |                                          | 28.06.2020    | 29170                                    | 12.07.2020    | 14354.4                                  |
| 13.07.2020    | 198190                                   | 08.06.2020    | 36504                                    | 16.06.2020    | 50205                                    |               |                                          | 01.07.2020    | 33870                                    |               |                                          |
|               |                                          | 11.06.2020    | 39931                                    | 20.06.2020    | 46631                                    |               |                                          | 05.07.2020    | 30485                                    |               |                                          |
|               |                                          | 15.06.2020    | 36880                                    | 22.06.2020    | 39922                                    |               |                                          | 08.07.2020    | 32610                                    |               |                                          |
|               |                                          | 18.06.2020    | 36735                                    | 23.06.2020    | 41960                                    |               |                                          | 15.07.2020    | 32190                                    |               |                                          |
|               |                                          | 22.06.2020    | 34673                                    | 27.06.2020    | 43008                                    |               |                                          | 19.07.2020    | 27540                                    |               |                                          |
|               |                                          | 25.06.2020    | 34919                                    | 30.06.2020    | 38943                                    |               |                                          | 22.07.2020    | 32440                                    |               |                                          |
|               |                                          | 29.06.2020    | 37465                                    | 08.07.2020*   | 42774                                    |               |                                          |               |                                          |               |                                          |
|               |                                          | 02.07.2020    | 33141                                    | 09.07.2020*   | 43129                                    |               |                                          |               |                                          |               |                                          |
|               |                                          | 06.07.2020    | 37119                                    | 10.07.2020*   | 41888                                    |               |                                          |               |                                          |               |                                          |
|               |                                          | 08.07.2020    | 35029                                    | 11.07.2020*   | 40442                                    |               |                                          |               |                                          |               |                                          |
|               |                                          | 09.07.2020    | 37450                                    | 12.07.2020*   | 40289                                    |               |                                          |               |                                          |               |                                          |
|               |                                          | 10.07.2020    | 37097                                    | 13.07.2020*   | 38301                                    |               |                                          |               |                                          |               |                                          |
|               |                                          | 11.07.2020    | 35513                                    | 14.07.2020*   | 40497                                    |               |                                          |               |                                          |               |                                          |

| Sampling date | Flow (m <sup>3</sup> day <sup>-1</sup> ) | Sampling date | Flow (m <sup>3</sup> day <sup>-1</sup> ) | Sampling date | Flow (m <sup>3</sup> day <sup>-1</sup> ) | Sampling date | Flow (m <sup>3</sup> day <sup>-1</sup> ) | Sampling date | Flow (m <sup>3</sup> day <sup>-1</sup> ) | Sampling date | Flow (m <sup>3</sup> day <sup>-1</sup> ) |
|---------------|------------------------------------------|---------------|------------------------------------------|---------------|------------------------------------------|---------------|------------------------------------------|---------------|------------------------------------------|---------------|------------------------------------------|
|               |                                          | 12.07.2020    | 37960                                    |               |                                          |               |                                          |               |                                          |               |                                          |
|               |                                          | 13.07.2020    | 35970                                    |               |                                          |               |                                          |               |                                          |               |                                          |
|               |                                          | 14.07.2020    | 37410                                    |               |                                          |               |                                          |               |                                          |               |                                          |
|               |                                          | 10.07.2020    | 41991                                    |               |                                          |               |                                          |               |                                          |               |                                          |
|               |                                          | 11.07.2020    | 40642                                    |               |                                          |               |                                          |               |                                          |               |                                          |
|               |                                          | 12.07.2020    | 38283                                    |               |                                          |               |                                          |               |                                          |               |                                          |
|               |                                          | 13.07.2020    | 35650                                    |               |                                          |               |                                          |               |                                          |               |                                          |
|               |                                          | 14.07.2020    | 36529                                    |               |                                          |               |                                          |               |                                          |               |                                          |

\* Except those days marked with a \* symbol, where the sampling mode was T: 10 min, 120 mL

**Table S2.** Concentration of each compound in the wastewater samples. MDL: method detection limit.

| City                             | Date (DD.MM.YYYY)        | Concentration (ng L <sup>-1</sup> ) |                             |                   |                    |                  |                   |                    |                     |       |
|----------------------------------|--------------------------|-------------------------------------|-----------------------------|-------------------|--------------------|------------------|-------------------|--------------------|---------------------|-------|
|                                  |                          | AMP                                 | MAMP                        | MDMA              | BE                 | COC              | THC-COOH          | COT                | OH-COT              | EtS   |
| Bilbao and its metropolitan area | 12.06.2019               | 418                                 | <MDL                        | 41                | 554                | 371              | 128               |                    |                     |       |
|                                  | 13.06.2019               | 597                                 | <MDL                        | 35                | 686                | 250              | 112               |                    |                     |       |
|                                  | 14.06.2019               | 1278                                | <MDL                        | 71                | 3871               | 653              | 219               |                    |                     |       |
|                                  | 15.06.2019               | 1503                                | <MDL                        | 76                | 3577               | 950              | 170               |                    |                     |       |
|                                  | 16.06.2019               | 1939                                | <MDL                        | 135               | 5692               | 666              | 247               |                    |                     |       |
|                                  | 17.06.2019               | 3581                                | <MDL                        | 538               | 6299               | 2467             | 188               |                    |                     |       |
|                                  | 18.06.2019               | 2667                                | <MDL                        | 301               | 6218               | 1219             | 215               |                    |                     |       |
|                                  | <b>Average 2019 ± SD</b> | <b>1712 ± 1126</b>                  | <b>&lt;MDL</b>              | <b>171 ± 186</b>  | <b>3843 ± 2448</b> | <b>939 ± 749</b> | <b>183 ± 49</b>   |                    |                     |       |
|                                  | 13.04.2020               | 1101                                | <MDL                        | 68                | 2199               | 507              | 144               | 2953               | 6107                | 15230 |
|                                  | 15.04.2020               | 1167                                | <MDL                        | 55                | 2240               | 924              | 344               | 1545               | 4605                | 18423 |
|                                  | 19.04.2020               | 698                                 | <MDL                        | 62                | 1873               | 740              | 225               | 1389               | 2539                | 14551 |
|                                  | 22.04.2020               | 527                                 | <MDL                        | 42                | 1036               | 524              | 305               | 1214               | 1781                | 20060 |
|                                  | 26.04.2020               | 640                                 | <MDL                        | 58                | 1432               | 614              | 160               | 1204               | 2346                | 23907 |
|                                  | 03.05.2020               | 810                                 | <MDL                        | 72                | 2180               | 1263             | 289               | 1959               | 3599                | 22355 |
|                                  | 06.05.2020               | 1612                                | <MDL                        | 62                | 2900               | 1458             | 231               | 3543               | 7223                | 20622 |
|                                  | 10.05.2020               | 1038                                | <MDL                        | 83                | 2433               | 633              | 172               | 1545               | 4398                | 25300 |
|                                  | 13.05.2020               | 626                                 | <MDL                        | 46                | 1445               | 733              | 289               | 1186               | 2401                | 14158 |
|                                  | 17.05.2020               | 2251                                | <MDL                        | 100               | 3998               | 2374             | 247               | 3920               | 7319                | 32315 |
|                                  | 20.05.2020               | 912                                 | <MDL                        | 47                | 1677               | 701              | 360               | 1481               | 3310                | 22093 |
|                                  | 24.05.2020               | 1253                                | <MDL                        | 84                | 2790               | 1267             | 358               | 1517               | 3434                | 22549 |
|                                  | 31.05.2020               | 1954                                | <MDL                        | 116               | 3501               | 2353             | 254               | 1582               | 4936                | 40607 |
|                                  | 03.06.2020               | 904                                 | <MDL                        | 50                | 2193               | 1273             | 159               | 1407               | 2249                | 23624 |
|                                  | 07.06.2020               | 316                                 | <MDL                        | 66                | 1950               | 1384             | 271               | 1076               | 1836                | 25304 |
|                                  | 10.06.2020               | 828                                 | <MDL                        | 50                | 1919               | 918              | 224               | 1748               | 2511                | 17447 |
|                                  | 14.06.2020               | 2461                                | <MDL                        | 154               | 4593               | 3307             | 214               | 4159               | 7250                | 20290 |
|                                  | 17.06.2020               | 922                                 | <MDL                        | 58                | 2231               | 968              | 322               | 1941               | 3407                | 21396 |
|                                  | 21.06.2020               | 1595                                | <MDL                        | 117               | 3367               | 2454             | 304               | 4086               | 7278                | 61028 |
| 24.06.2020                       | 2096                     | <MDL                                | 88                          | 2955              | 2245               | 224              | 3570              | 8036               | 34412               |       |
| 28.06.2020                       | 1659                     | <MDL                                | 156                         | 3650              | 2486               | 179              | 2374              | 5694               | 29522               |       |
| 01.07.2020                       | 1135                     | <MDL                                | 87                          | 2596              | 1174               | 136              | 2134              | 5184               | 12963               |       |
| 08.07.2020                       | 1271                     | <MDL                                | 61                          | 2420              | 1749               | 119              | 1867              | 3475               | 21708               |       |
| 09.07.2020                       | 1561                     | <MDL                                | 1732                        | 3279              | 2223               | 201              | 2226              | 5335               | 32167               |       |
| 12.07.2020                       | 854                      | <MDL                                | 134                         | 2073              | 1102               | 273              | 1830              | 3531               | 25318               |       |
| 13.07.2020                       | 925                      | <MDL                                | 193                         | 3414              | 1892               | 602              | 1784              | 3641               | 25180               |       |
| <b>Average 2020 ± SD</b>         | <b>1197 ± 553</b>        | <b>&lt;MDL</b>                      | <b>147 ± 40<sup>a</sup></b> | <b>2552 ± 855</b> | <b>1433 ± 761</b>  | <b>254 ± 99</b>  | <b>2124 ± 959</b> | <b>4362 ± 1915</b> | <b>24712 ± 9869</b> |       |
| Castellón                        | 10.04.2019               | <MDL                                | <MDL                        | 30                | 2864               | 1456             | 377               | 1867               | 2208                | 4618  |

| City | Date (DD.MM.YYYY)        | Concentration (ng L <sup>-1</sup> ) |                |                |                   |                   |                 |                   |                    |                      |
|------|--------------------------|-------------------------------------|----------------|----------------|-------------------|-------------------|-----------------|-------------------|--------------------|----------------------|
|      |                          | AMP                                 | MAMP           | MDMA           | BE                | COC               | THC-COOH        | COT               | OH-COT             | EtS                  |
|      | 11.04.2019               | <MDL                                | <MDL           | 22             | 2826              | 1264              | 379             | 3422              | 3920               | 13047                |
|      | 12.04.2019               | <MDL                                | <MDL           | 24             | 2620              | 1260              | 354             | 1783              | 2060               | 6308                 |
|      | 13.04.2019               | <MDL                                | <MDL           | 29             | 3282              | 1408              | 371             | 3806              | 4432               | 24643                |
|      | 14.04.2019               | <MDL                                | <MDL           | 119            | 4372              | 1860              | 373             | 4162              | 5052               | 55360                |
|      | 15.04.2019               | <MDL                                | <MDL           | 127            | 4148              | 1574              | 334             | 3778              | 4325               | 32558                |
|      | 16.04.2019               | <MDL                                | <MDL           | 44             | 2652              | 1154              | 492             | 3329              | 3731               | 16294                |
|      | <b>Average 2019 ± SD</b> | <b>&lt;MDL</b>                      | <b>&lt;MDL</b> | <b>57 ± 46</b> | <b>3252 ± 724</b> | <b>1425 ± 238</b> | <b>383 ± 51</b> | <b>3164 ± 955</b> | <b>3676 ± 1134</b> | <b>21833 ± 17759</b> |
|      | 26.03.2020               | <MDL                                | <MDL           | 20             | 1461              | 555               | 339             | 2079              | 4591               | 20757                |
|      | 27.03.2020               | <MDL                                | <MDL           | 26             | 1990              | 1010              | 389             | 4389              | 6272               | 82835                |
|      | 28.03.2020               | <MDL                                | <MDL           | 21             | 1402              | 401               | 310             | 4951              | 7333               | 17036                |
|      | 29.03.2020               | <MDL                                | <MDL           | 28             | 1774              | 536               | 348             | 2898              | 7567               | 35275                |
|      | 30.03.2020               | <MDL                                | <MDL           | 4.5            | 566               | 196               | 294             | 1177              | 2222               | 27829                |
|      | 31.03.2020               | <MDL                                | <MDL           | 4.5            | 452               | 66                | 222             | 1766              | 1877               | 13592                |
|      | 01.04.2020               | <MDL                                | <MDL           | 4.5            | 341               | 271               | 281             | 855               | 1064               | 34280                |
|      | 05.04.2020               | <MDL                                | <MDL           | 24             | 2772              | 1268              | 356             | 1849              | 3958               | 21275                |
|      | 08.04.2020               | <MDL                                | <MDL           | 44             | 2388              | 508               | 388             | 1315              | 2580               | 22075                |
|      | 13.04.2020               | <MDL                                | <MDL           | 28             | 1880              | 424               | 396             | 2088              | 4550               | 38059                |
|      | 16.04.2020               | <MDL                                | <MDL           | 12             | 1660              | 672               | 312             | 2281              | 5129               | 19351                |
|      | 19.04.2020               | <MDL                                | <MDL           | 24             | 1764              | 456               | 484             | 1168              | 2098               | 19114                |
|      | 23.04.2020               | <MDL                                | <MDL           | 16             | 2208              | 604               | 440             | 3064              | 7071               | 18843                |
|      | 27.04.2020               | <MDL                                | <MDL           | 16             | 1624              | 436               | 476             | 1729              | 3627               | 33915                |
|      | 29.04.2020               | <MDL                                | <MDL           | 12             | 1652              | 892               | 444             | 1536              | 2966               | 32144                |
|      | 04.05.2020               | <MDL                                | <MDL           | 10             | 1856              | 424               | 288             | 1748              | 3517               | 28767                |
|      | 07.05.2020               | <MDL                                | <MDL           | 4.5            | 2396              | 552               | 336             | 1876              | 4095               | 18132                |
|      | 11.05.2020               | <MDL                                | <MDL           | 12             | 2692              | 548               | 392             | 1398              | 3531               | 22021                |
|      | 14.05.2020               | <MDL                                | <MDL           | 4.5            | 1308              | 264               | 304             | 1076              | 2497               | 22312                |
|      | 18.05.2020               | <MDL                                | <MDL           | 4.5            | 1408              | 416               | 292             | 2107              | 4371               | 26585                |
|      | 21.05.2020               | <MDL                                | <MDL           | 4.5            | 1392              | 616               | 292             | 1297              | 2249               | 22845                |
|      | 25.05.2020               | <MDL                                | <MDL           | 4.5            | 856               | 572               | 248             | 1665              | 1836               | 10528                |
|      | 28.05.2020               | <MDL                                | <MDL           | 4.5            | 1300              | 680               | 316             | 1665              | 3351               | 16913                |
|      | 01.06.2020               | <MDL                                | <MDL           | 11             | 1588              | 724               | 296             | 1306              | 2525               | 28705                |
|      | 04.06.2020               | <MDL                                | <MDL           | 20             | 1800              | 1140              | 300             | 1766              | 4178               | 21468                |
|      | 08.06.2020               | <MDL                                | <MDL           | 24             | 2052              | 212               | 272             | 2604              | 6437               | 29873                |
|      | 11.06.2020               | <MDL                                | <MDL           | 4.5            | 2272              | 400               | 316             | 1692              | 3544               | 18458                |
|      | 15.06.2020               | <MDL                                | <MDL           | 36             | 2460              | 264               | 356             | 2125              | 4908               | 41761                |
|      | 18.06.2020               | <MDL                                | <MDL           | 4.5            | 2144              | 360               | 400             | 1711              | 4082               | 39930                |
|      | 22.06.2020               | <MDL                                | <MDL           | 20             | 1640              | 736               | 348             | 1416              | 2924               | 40966                |
|      | 25.06.2020               | <MDL                                | <MDL           | 28             | 1760              | 552               | 316             | 1287              | 2676               | 28362                |

| City                   | Date (DD.MM.YYYY)        | Concentration (ng L <sup>-1</sup> ) |                |                |                   |                  |                  |                   |                    |                      |
|------------------------|--------------------------|-------------------------------------|----------------|----------------|-------------------|------------------|------------------|-------------------|--------------------|----------------------|
|                        |                          | AMP                                 | MAMP           | MDMA           | BE                | COC              | THC-COOH         | COT               | OH-COT             | EtS                  |
|                        | 29.06.2020               | < MDL                               | < MDL          | 32             | 2052              | 1048             | 552              | 1508              | 2814               | 71848                |
|                        | 02.07.2020               | < MDL                               | < MDL          | 4.5            | 2220              | 328              | 372              | 1628              | 3641               | 69064                |
|                        | 06.07.2020               | < MDL                               | < MDL          | 24             | 2116              | 312              | 348              | 1665              | 4440               | 27543                |
|                        | 08.07.2020               | < MDL                               | < MDL          | 4.5            | 2252              | 144              | 340              | 2990              | 7788               | 42243                |
|                        | 09.07.2020               | < MDL                               | < MDL          | 4.5            | 2304              | 200              | 316              | 1812              | 3944               | 40070                |
|                        | 10.07.2020               | < MDL                               | < MDL          | 4.5            | 1992              | 1120             | 264              | 1821              | 3668               | 42581                |
|                        | 11.07.2020               | < MDL                               | < MDL          | 12             | 1980              | 1216             | 324              | 1876              | 3572               | 34790                |
|                        | 12.07.2020               | < MDL                               | < MDL          | 32             | 2324              | 300              | 464              | 1343              | 3613               | 86163                |
|                        | 13.07.2020               | < MDL                               | < MDL          | 44             | 2128              | 960              | 316              | 1812              | 4178               | 24267                |
|                        | 14.07.2020               | < MDL                               | < MDL          | 10             | 1836              | 984              | 324              | 1425              | 3847               | 24409                |
|                        | <b>Average 2020 ± SD</b> | <b>&lt;MDL</b>                      | <b>&lt;MDL</b> | <b>16 ± 12</b> | <b>1806 ± 555</b> | <b>569 ± 315</b> | <b>346 ± 69</b>  | <b>1897 ± 803</b> | <b>3930 ± 1604</b> | <b>32121 ± 17421</b> |
|                        | 21.05.2019               | 73                                  | < MDL          | 25             | 904               | 555              | 220              | 1297              | 1605               | 8267                 |
|                        | 22.05.2019               | 79                                  | < MDL          | 22             | 1303              | 559              | 187              | 1343              | 1701               | 8307                 |
|                        | 24.05.2019               | 47                                  | < MDL          | 69             | 1096              | 863              | 591              | 1122              | 1329               | 9290                 |
|                        | 25.05.2019               | < MDL                               | < MDL          | 69             | 2049              | 793              | 407              | 1637              | 2060               | 8996                 |
|                        | 26.05.2019               | 52                                  | < MDL          | 71             | 1948              | 668              | 401              | 1775              | 2101               | 18917                |
|                        | 27.05.2019               | < MDL                               | < MDL          | 36             | 1463              | 539              | 465              | 1435              | 1619               | 13752                |
|                        | 28.05.2019               | 46                                  | < MDL          | 22             | 1586              | 616              | 301              | 1481              | 1825               | 13204                |
|                        | <b>Average 2019 ± SD</b> | <b>59 ± 16</b>                      | <b>&lt;MDL</b> | <b>45 ± 23</b> | <b>1479 ± 421</b> | <b>656 ± 127</b> | <b>367 ± 142</b> | <b>1441 ± 218</b> | <b>1749 ± 271</b>  | <b>11533 ± 3975</b>  |
| Santiago de Compostela | 10.03.2020               | < MDL                               | < MDL          | 19             | 877               | 436              | 168              | 794               | 1565               | 7355                 |
|                        | 11.03.2020               | < MDL                               | < MDL          | 110            | 1238              | 465              | 170              | 680               | 1467               | 9438                 |
|                        | 12.03.2020               | < MDL                               | < MDL          | 788            | 1007              | 341              | 163              | 818               | 1357               | 9577                 |
|                        | 13.03.2020               | < MDL                               | < MDL          | 47             | 1352              | 496              | 193              | 735               | 1274               | 9046                 |
|                        | 14.03.2020               | < MDL                               | < MDL          | 70             | 1285              | 476              | 179              | 744               | 1522               | 11092                |
|                        | 07.04.2020               | < MDL                               | < MDL          | 16             | 990               | 142              | 97               | 763               | 1412               | 12926                |
|                        | 13.04.2020               | < MDL                               | < MDL          | 39             | 1786              | 596              | 162              | 2017              | 3153               | 12929                |
|                        | 14.04.2020               | < MDL                               | < MDL          | 33             | 1065              | 207              | 165              | 1076              | 1440               | 8010                 |
|                        | 19.04.2020               | < MDL                               | < MDL          | 11             | 930               | 119              | 91               | 634               | 1302               | 10612                |
|                        | 21.04.2020               | < MDL                               | < MDL          | 26             | 1097              | 150              | 135              | 883               | 2186               | 4947                 |
|                        | 25.04.2020               | < MDL                               | < MDL          | 44             | 2795              | 392              | 120              | 3451              | 5252               | 20513                |
|                        | 03.05.2020               | < MDL                               | < MDL          | 66             | 2199              | 459              | 205              | 2097              | 4099               | 26808                |
|                        | 04.05.2020               | < MDL                               | < MDL          | 54             | 1606              | 367              | 128              | 1538              | 3526               | 15824                |
|                        | 05.05.2020               | < MDL                               | < MDL          | 19             | 1040              | 212              | 109              | 818               | 1688               | 9353                 |
|                        | 10.05.2020               | < MDL                               | < MDL          | 38             | 1307              | 211              | 149              | 1232              | 2652               | 9935                 |
|                        | 12.05.2020               | < MDL                               | < MDL          | 102            | 2429              | 463              | 119              | 1610              | 3616               | 18785                |
|                        | 17.05.2020               | < MDL                               | < MDL          | 104            | 2313              | 329              | 197              | 1946              | 3277               | 17332                |
| 19.05.2020             | < MDL                    | < MDL                               | 45             | 1639           | 309               | 137              | 1941             | 2872              | 14906              |                      |
| 24.05.2020             | < MDL                    | < MDL                               | 43             | 1389           | 318               | 133              | 1297             | 2886              | 16779              |                      |

| City            | Date (DD.MM.YYYY)        | Concentration (ng L <sup>-1</sup> ) |                |                            |                   |                  |                 |                   |                   |                     |
|-----------------|--------------------------|-------------------------------------|----------------|----------------------------|-------------------|------------------|-----------------|-------------------|-------------------|---------------------|
|                 |                          | AMP                                 | MAMP           | MDMA                       | BE                | COC              | THC-COOH        | COT               | OH-COT            | EtS                 |
|                 | 27.05.2020               | < MDL                               | < MDL          | 41                         | 1455              | 529              | 104             | 1711              | 2390              | 15191               |
|                 | 30.05.2020               | < MDL                               | < MDL          | 56                         | 1845              | 275              | 161             | 2123              | 2435              | 21289               |
|                 | 02.06.2020               | < MDL                               | < MDL          | 44                         | 1989              | 549              | 125             | 1822              | 4244              | 17413               |
|                 | 07.06.2020               | < MDL                               | < MDL          | 40                         | 1579              | 401              | 109             | 1273              | 2407              | 13654               |
|                 | 09.06.2020               | < MDL                               | < MDL          | 28                         | 1210              | 348              | 219             | 1536              | 2073              | 11161               |
|                 | 13.06.2020               | < MDL                               | < MDL          | 51                         | 1741              | 451              | 200             | 1297              | 1743              | 21889               |
|                 | 16.06.2020               | < MDL                               | < MDL          | 20                         | 1495              | 484              | 205             | 1085              | 2115              | 11930               |
|                 | 20.06.2020               | < MDL                               | < MDL          | 44                         | 1317              | 356              | 152             | 1485              | 1662              | 12000               |
|                 | 22.06.2020               | < MDL                               | < MDL          | 29                         | 1661              | 537              | 183             | 1536              | 2046              | 19999               |
|                 | 23.06.2020               | < MDL                               | < MDL          | 32                         | 1671              | 300              | 306             | 1435              | 2197              | 17845               |
|                 | 27.06.2020               | < MDL                               | < MDL          | 41                         | 2143              | 681              | 270             | 1674              | 1936              | 19097               |
|                 | 30.06.2020               | < MDL                               | < MDL          | 30                         | 1629              | 405              | 231             | 1435              | 3355              | 15089               |
|                 | 08.07.2020               | < MDL                               | < MDL          | 70                         | 1836              | 842              | 273             | 1491              | 2760              | 19898               |
|                 | 09.07.2020               | < MDL                               | < MDL          | 60                         | 1524              | 697              | 546             | 1428              | 2116              | 15793               |
|                 | 10.07.2020               | < MDL                               | < MDL          | 67                         | 1745              | 922              | 243             | 1553              | 1656              | 22001               |
|                 | 11.07.2020               | < MDL                               | < MDL          | 165                        | 3245              | 1497             | 278             | 1991              | 2742              | 37096               |
|                 | 12.07.2020               | < MDL                               | < MDL          | 128                        | 2104              | 949              | 215             | 1522              | 1453              | 24523               |
|                 | 13.07.2020               | < MDL                               | < MDL          | 104                        | 1884              | 804              | 254             | 1491              | 2760              | 20619               |
|                 | 14.07.2020               | < MDL                               | < MDL          | 102                        | 1928              | 901              | 322             | 1240              | 1969              | 19479               |
|                 | <b>Average 2020 ± SD</b> | <b>&lt;MDL</b>                      | <b>&lt;MDL</b> | <b>55 ± 34<sup>b</sup></b> | <b>1640 ± 518</b> | <b>484 ± 274</b> | <b>189 ± 84</b> | <b>1426 ± 545</b> | <b>2384 ± 928</b> | <b>15845 ± 6266</b> |
| Vitoria-Gasteiz | 28.04.2020               | 735                                 | <MDL           | 29                         | 986               | 283              | 192             | 1563              | 2266              | 10634               |
|                 | 29.04.2020               | 856                                 | <MDL           | 28                         | 1101              | 526              | 239             | 3469              | 4879              | 13658               |
|                 | 04.05.2020               | 886                                 | <MDL           | 70                         | 2189              | 1153             | 299             | 5418              | 5956              | 25966               |
|                 | 07.05.2020               | 698                                 | <MDL           | 48                         | 1290              | 637              | 261             | 2955              | 3457              | 12300               |
|                 | 11.05.2020               | 568                                 | <MDL           | 31                         | 912               | 259              | 237             | 1273              | 2656              | 13061               |
|                 | 14.05.2020               | 961                                 | <MDL           | 48                         | 1457              | 749              | 63              | 2033              | 2445              | 10114               |
|                 | 18.05.2020               | 782                                 | <MDL           | 28                         | 1298              | 677              | 213             | 1168              | 3503              | 14807               |
|                 | 21.05.2020               | 812                                 | <MDL           | 21                         | 1628              | 966              | 167             | 1932              | 2790              | 13048               |
|                 | 25.05.2020               | 551                                 | <MDL           | 75                         | 1027              | 364              | 190             | 1574              | 2117              | 13270               |
|                 | 01.06.2020               | 1856                                | <MDL           | 113                        | 4934              | 2347             | 145             | 6498              | 8607              | 37217               |
|                 | 08.06.2020               | 1295                                | <MDL           | 69                         | 2817              | 1064             | 201             | 2424              | 4769              | 18708               |
|                 | 15.06.2020               | 436                                 | <MDL           | 60                         | 2039              | 846              | 260             | 1680              | 3388              | 16809               |
|                 | 22.06.2020               | 1374                                | <MDL           | 100                        | 3235              | 1520             | 133             | 2690              | 4175              | 30496               |
|                 | 29.06.2020               | 951                                 | <MDL           | 134                        | 3487              | 259              | 64              | 2725              | 6674              | 33066               |
|                 | 07.07.2020               | 717                                 | <MDL           | 55                         | 1492              | 586              | 247             | 1308              | 1717              | 10862               |
| 08.07.2020      | 758                      | <MDL                                | 56             | 1349                       | 532               | 255              | 1662            | 1786              | 11025             |                     |
| 09.07.2020      | 873                      | <MDL                                | 49             | 1555                       | 740               | 281              | 1592            | 1786              | 13757             |                     |
| 10.07.2020      | 1117                     | <MDL                                | 52             | 2003                       | 840               | 211              | 2371            | 4216              | 23282             |                     |

| City          | Date (DD.MM.YYYY)        | Concentration (ng L <sup>-1</sup> ) |                |                 |                    |                  |                  |                    |                    |                      |
|---------------|--------------------------|-------------------------------------|----------------|-----------------|--------------------|------------------|------------------|--------------------|--------------------|----------------------|
|               |                          | AMP                                 | MAMP           | MDMA            | BE                 | COC              | THC-COOH         | COT                | OH-COT             | EtS                  |
|               | 11.07.2020               | 1088                                | <MDL           | 50              | 1994               | 1087             | 138              | 1290               | 3029               | 16633                |
|               | 12.07.2020               | 1140                                | <MDL           | 93              | 3201               | 1478             | 185              | 1538               | 2352               | 51465                |
|               | 13.07.2020               | 1361                                | <MDL           | 94              | 2476               | 1196             | 326              | 1999               | 2697               | 38391                |
|               | <b>Average 2020 ± SD</b> | <b>944 ± 332</b>                    | <b>&lt;MDL</b> | <b>62 ± 30</b>  | <b>2022 ± 1024</b> | <b>836 ± 533</b> | <b>205 ± 69</b>  | <b>2341 ± 1360</b> | <b>3584 ± 1782</b> | <b>20408 ± 11463</b> |
| Porto         | 19.04.2020               | <MDL                                | <MDL           | 192             | 2455               | 397              | 122              | 2834               | 3465               | 36400                |
|               | 22.04.2020               | <MDL                                | <MDL           | 42              | 1479               | 453              | 103              | 2180               | 2831               | 19290                |
|               | 30.04.2020               | <MDL                                | <MDL           | 76              | 1444               | 696              | 421              | 2116               | 2721               | 17497                |
|               | 03.05.2020               | <MDL                                | <MDL           | 109             | 2129               | 779              | 574              | 2263               | 2900               | 27806                |
|               | 06.05.2020               | <MDL                                | <MDL           | 90              | 2496               | 2159             | 688              | 2328               | 3024               | 20978                |
|               | 10.05.2020               | <MDL                                | <MDL           | 162             | 2431               | 1640             | 267              | 1969               | 2583               | 21149                |
|               | 13.05.2020               | <MDL                                | <MDL           | 74              | 1204               | 463              | 355              | 1637               | 2170               | 12953                |
|               | 17.05.2020               | <MDL                                | <MDL           | 138             | 1573               | 507              | 554              | 2061               | 2459               | 26992                |
|               | 19.05.2020               | <MDL                                | <MDL           | 68              | 1460               | 486              | 482              | 2061               | 3423               | 15978                |
|               | 20.05.2020               | <MDL                                | <MDL           | 77              | 1583               | 1048             | 312              | 1867               | 3355               | 19817                |
|               | 21.05.2020               | <MDL                                | <MDL           | 53              | 1589               | 975              | 170              | 1941               | 3465               | 12699                |
|               | 22.05.2020               | <MDL                                | <MDL           | 77              | 1442               | 929              | 169              | 1692               | 3093               | 16088                |
|               | 23.05.2020               | <MDL                                | <MDL           | 134             | 1585               | 529              | 332              | 1840               | 3382               | 33868                |
|               | 24.05.2020               | <MDL                                | <MDL           | 196             | 1654               | 387              | 285              | 2079               | 4443               | 25058                |
|               | 25.05.2020               | <MDL                                | <MDL           | 89              | 1306               | 400              | 286              | 1886               | 4126               | 18869                |
|               | 27.05.2020               | <MDL                                | <MDL           | 68              | 1466               | 617              | 189              | 1922               | 4030               | 20099                |
|               | 31.05.2020               | <MDL                                | <MDL           | 127             | 2369               | 914              | 425              | 2107               | 4553               | 13848                |
|               | 03.06.2020               | <MDL                                | <MDL           | 81              | 1837               | 958              | 416              | 1904               | 3809               | 36814                |
|               | 07.06.2020               | <MDL                                | <MDL           | 164             | 1822               | 649              | 578              | 2125               | 4843               | 27412                |
|               | 11.06.2020               | <MDL                                | <MDL           | 105             | 2004               | 553              | 447              | 2171               | 4539               | 25933                |
|               | 14.06.2020               | <MDL                                | <MDL           | 194             | 2261               | 654              | 484              | 2143               | 4278               | 13888                |
|               | 17.06.2020               | <MDL                                | <MDL           | 80              | 1879               | 713              | 549              | 1858               | 3727               | 17497                |
|               | 21.06.2020               | <MDL                                | <MDL           | 119             | 2084               | 552              | 392              | 2005               | 4043               | 37213                |
| 24.06.2020    | <MDL                     | <MDL                                | 278            | 2153            | 548                | 522              | 1904             | 4085               | 21054              |                      |
| 28.06.2020    | <MDL                     | <MDL                                | 146            | 1850            | 451                | 223              | 2061             | 4595               | 29897              |                      |
| 01.07.2020    | <MDL                     | <MDL                                | 95             | 1643            | 595                | 199              | 2153             | 4774               | 33498              |                      |
| 05.07.2020    | <MDL                     | <MDL                                | 181            | 2306            | 561                | 195              | 2677             | 5697               | 40207              |                      |
| 08.07.2020    | <MDL                     | <MDL                                | 83             | 2300            | 1736               | 304              | 2420             | 4967               | 25728              |                      |
| 15.07.2020    | <MDL                     | <MDL                                | 76             | 1458            | 659                | 161              | 1950             | 4071               | 29556              |                      |
| 19.07.2020    | <MDL                     | <MDL                                | 137            | 2659            | 472                | 602              | 2051             | 4705               | 51124              |                      |
| 22.07.2020    | <MDL                     | <MDL                                | 74             | 1256            | 987                | 302              | 2671             | 3752               | 14847              |                      |
|               | <b>Average 2020 ± SD</b> | <b>&lt;MDL</b>                      | <b>&lt;MDL</b> | <b>115 ± 53</b> | <b>1844 ± 417</b>  | <b>756 ± 415</b> | <b>358 ± 160</b> | <b>2092 ± 270</b>  | <b>3803 ± 842</b>  | <b>24647 ± 9366</b>  |
| Vila do Conde | 22.04.2020               | <MDL                                | <MDL           | 22              | 886                | 196              | 107              | 2245               | 3437               | 22471                |
|               | 26.04.2020               | <MDL                                | <MDL           | 161             | 1332               | 237              | 120              | 2281               | 3644               | 27726                |



| City                     | Date (DD.MM.YYYY) | Concentration (ng L <sup>-1</sup> ) |                |                |                   |                  |                 |                   |                    |                      |
|--------------------------|-------------------|-------------------------------------|----------------|----------------|-------------------|------------------|-----------------|-------------------|--------------------|----------------------|
|                          |                   | AMP                                 | MAMP           | MDMA           | BE                | COC              | THC-COOH        | COT               | OH-COT             | EtS                  |
|                          | 29.04.2020        | < MDL                               | < MDL          | 27             | 753               | 137              | 87              | 1485              | 1814               | 16066                |
|                          | 03.05.2020        | < MDL                               | < MDL          | 166            | 1140              | 244              | 97              | 2619              | 3968               | 40167                |
|                          | 06.05.2020        | < MDL                               | < MDL          | 103            | 753               | 151              | 96              | 2088              | 3093               | 43328                |
|                          | 10.05.2020        | < MDL                               | < MDL          | 97             | 1012              | 209              | 77              | 1711              | 2542               | 36403                |
|                          | 13.05.2020        | < MDL                               | < MDL          | 28             | 950               | 176              | 82              | 1978              | 2969               | 28861                |
|                          | 17.05.2020        | < MDL                               | < MDL          | 142            | 1041              | 172              | 74              | 2079              | 3093               | 38574                |
|                          | 20.05.2020        | < MDL                               | < MDL          | 49             | 743               | 156              | 94              | 1886              | 3079               | 23217                |
|                          | 24.05.2020        | < MDL                               | < MDL          | 110            | 1345              | 253              | 71              | 2374              | 3616               | 47598                |
|                          | 31.05.2020        | < MDL                               | < MDL          | 271            | 2844              | 441              | 30              | 3717              | 7942               | 57533                |
|                          | 03.06.2020        | < MDL                               | < MDL          | 60             | 1757              | 355              | 134             | 3055              | 6069               | 35870                |
|                          | 07.06.2020        | < MDL                               | < MDL          | 200            | 2061              | 339              | 30              | 2972              | 6344               | 49163                |
|                          | 14.06.2020        | < MDL                               | < MDL          | 43             | 519               | 24               | 110             | 1370              | 2721               | 16267                |
|                          | 17.06.2020        | < MDL                               | < MDL          | 46             | 1274              | 331              | 30              | 2659              | 5380               | 32872                |
|                          | 21.06.2020        | < MDL                               | < MDL          | 39             | 379               | 56               | 133             | 1020              | 1880               | 17486                |
|                          | 23.06.2020        | < MDL                               | < MDL          | 54             | 1035              | 148              | 146             | 2134              | 4691               | 26606                |
|                          | 28.06.2020        | < MDL                               | < MDL          | 62             | 1444              | 232              | 133             | 2484              | 5531               | 38007                |
|                          | 01.07.2020        | < MDL                               | < MDL          | 50             | 1134              | 275              | 149             | 2254              | 4939               | 29201                |
|                          | 05.07.2020        | < MDL                               | < MDL          | 81             | 1857              | 356              | 30              | 2677              | 5972               | 41879                |
|                          | 08.07.2020        | < MDL                               | < MDL          | 46             | 978               | 232              | 280             | 2153              | 4732               | 23730                |
|                          | 09.07.2020        | < MDL                               | < MDL          | 26             | 1237              | 228              | 213             | 2245              | 4925               | 38326                |
|                          | 10.07.020         | < MDL                               | < MDL          | 20             | 492               | 101              | 207             | 1011              | 1894               | 9200                 |
|                          | 11.07.2020        | < MDL                               | < MDL          | 48             | 1490              | 365              | 223             | 2705              | 5807               | 24711                |
|                          | 12.07.2020        | < MDL                               | < MDL          | 155            | 1714              | 796              | 357             | 1959              | 4057               | 20831                |
| <b>Average 2020 ± SD</b> |                   | <b>&lt;MDL</b>                      | <b>&lt;MDL</b> | <b>84 ± 65</b> | <b>1206 ± 547</b> | <b>248 ± 152</b> | <b>124 ± 79</b> | <b>2206 ± 615</b> | <b>4165 ± 1586</b> | <b>31443 ± 11797</b> |

<sup>a</sup> Average without considering July 9, 2020.

<sup>b</sup> Average without considering March 12, 2020.

**Table S3.** Excretion loads calculated from the concentrations measured in wastewater (Table S2) after considering WWTP flow data and population served (Table S1)

| City                             | Date (DD.MM.YYYY)        | Excretion loads (mg day <sup>-1</sup> 1000inhabitant <sup>-1</sup> ) |                |                  |                  |                  |                  |                  |                    |       |  |
|----------------------------------|--------------------------|----------------------------------------------------------------------|----------------|------------------|------------------|------------------|------------------|------------------|--------------------|-------|--|
|                                  |                          | AMP                                                                  | MAMP           | MDMA             | BE               | COC              | THC-COOH         | COT              | OH-COT             | EtS   |  |
| Bilbao and its metropolitan area | 12.06.2019               | 94                                                                   | < MDL          | 9.2              | 125              | 84               | 29               |                  |                    |       |  |
|                                  | 13.06.2019               | 127                                                                  | < MDL          | 8.2              | 146              | 53               | 24               |                  |                    |       |  |
|                                  | 14.06.2019               | 236                                                                  | < MDL          | 13               | 717              | 121              | 40               |                  |                    |       |  |
|                                  | 15.06.2019               | 286                                                                  | < MDL          | 14               | 681              | 181              | 32               |                  |                    |       |  |
|                                  | 16.06.2019               | 404                                                                  | < MDL          | 28               | 1184             | 139              | 51               |                  |                    |       |  |
|                                  | 17.06.2019               | 762                                                                  | < MDL          | 115              | 1341             | 525              | 40               |                  |                    |       |  |
|                                  | 18.06.2019               | 569                                                                  | < MDL          | 64               | 1327             | 260              | 46               |                  |                    |       |  |
|                                  | <b>Average 2019 ± SD</b> | <b>354 ± 242</b>                                                     | <b>&lt;MDL</b> | <b>36 ± 40</b>   | <b>789 ± 520</b> | <b>195 ± 161</b> | <b>38 ± 10</b>   |                  |                    |       |  |
|                                  | 13.04.2020               | 264                                                                  | <MDL           | 16               | 528              | 122              | 35               | 709              | 1466               | 3657  |  |
|                                  | 15.04.2020               | 219                                                                  | <MDL           | 10               | 420              | 173              | 64               | 289              | 862                | 3450  |  |
|                                  | 19.04.2020               | 177                                                                  | <MDL           | 16               | 474              | 187              | 57               | 352              | 643                | 3684  |  |
|                                  | 22.04.2020               | 140                                                                  | <MDL           | 11               | 275              | 139              | 81               | 322              | 473                | 5325  |  |
|                                  | 26.04.2020               | 144                                                                  | <MDL           | 13               | 322              | 138              | 36               | 271              | 528                | 5379  |  |
|                                  | 03.05.2020               | 156                                                                  | <MDL           | 14               | 421              | 244              | 56               | 378              | 694                | 4313  |  |
|                                  | 06.05.2020               | 333                                                                  | <MDL           | 13               | 599              | 301              | 48               | 732              | 1492               | 4260  |  |
|                                  | 10.05.2020               | 442                                                                  | <MDL           | 35               | 1037             | 270              | 73               | 658              | 1874               | 10780 |  |
|                                  | 13.05.2020               | 177                                                                  | <MDL           | 13               | 409              | 207              | 82               | 335              | 679                | 4004  |  |
|                                  | 17.05.2020               | 413                                                                  | <MDL           | 18               | 733              | 435              | 45               | 719              | 1342               | 5926  |  |
|                                  | 20.05.2020               | 178                                                                  | <MDL           | 9.2              | 327              | 137              | 70               | 289              | 646                | 4312  |  |
|                                  | 24.05.2020               | 269                                                                  | <MDL           | 18               | 598              | 272              | 77               | 325              | 736                | 4834  |  |
|                                  | 31.05.2020               | 348                                                                  | <MDL           | 21               | 623              | 419              | 45               | 282              | 878                | 4905  |  |
|                                  | 03.06.2020               | 163                                                                  | <MDL           | 9.0              | 396              | 230              | 29               | 254              | 406                | 7227  |  |
|                                  | 07.06.2020               | 105                                                                  | <MDL           | 22               | 648              | 460              | 90               | 357              | 610                | 4268  |  |
|                                  | 10.06.2020               | 123                                                                  | <MDL           | 7.4              | 284              | 136              | 33               | 258              | 371                | 8403  |  |
|                                  | 14.06.2020               | 483                                                                  | <MDL           | 30               | 901              | 648              | 42               | 816              | 1422               | 2581  |  |
|                                  | 17.06.2020               | 201                                                                  | <MDL           | 13               | 485              | 211              | 70               | 422              | 741                | 3978  |  |
|                                  | 21.06.2020               | 288                                                                  | <MDL           | 21               | 608              | 443              | 55               | 738              | 1315               | 4656  |  |
|                                  | 24.06.2020               | 399                                                                  | <MDL           | 17               | 562              | 427              | 43               | 679              | 1528               | 11026 |  |
|                                  | 28.06.2020               | 276                                                                  | <MDL           | 26               | 606              | 413              | 30               | 394              | 946                | 6544  |  |
|                                  | 01.07.2020               | 262                                                                  | <MDL           | 20               | 600              | 271              | 31               | 493              | 1198               | 2996  |  |
| 08.07.2020                       | 269                      | <MDL                                                                 | 13             | 513              | 371              | 25               | 396              | 737              | 4601               |       |  |
| 09.07.2020                       | 276                      | <MDL                                                                 | 306            | 580              | 393              | 36               | 393              | 943              | 5685               |       |  |
| 12.07.2020                       | 286                      | <MDL                                                                 | 45             | 694              | 369              | 91               | 613              | 1181             | 8472               |       |  |
| 13.07.2020                       | 213                      | <MDL                                                                 | 45             | 787              | 436              | 139              | 411              | 839              | 5801               |       |  |
| <b>Average 2020 ± SD</b>         | <b>253 ± 102</b>         | <b>&lt;MDL</b>                                                       | <b>19 ± 10</b> | <b>555 ± 183</b> | <b>302 ± 135</b> | <b>57 ± 26</b>   | <b>457 ± 182</b> | <b>944 ± 400</b> | <b>5426 ± 2176</b> |       |  |

| City       | Date (DD.MM.YYYY)        | Excretion loads (mg day <sup>-1</sup> 1000inhabitant <sup>-1</sup> ) |                |                |                  |                 |                |                  |                  |                    |
|------------|--------------------------|----------------------------------------------------------------------|----------------|----------------|------------------|-----------------|----------------|------------------|------------------|--------------------|
|            |                          | AMP                                                                  | MAMP           | MDMA           | BE               | COC             | THC-COOH       | COT              | OH-COT           | EtS                |
| Castellón  | 10.04.2019               | <MDL                                                                 | <MDL           | 6.8            | 638              | 324             | 84             | 416              | 492              | 1029               |
|            | 11.04.2019               | <MDL                                                                 | <MDL           | 4.9            | 617              | 276             | 83             | 747              | 856              | 2849               |
|            | 12.04.2019               | <MDL                                                                 | <MDL           | 5.4            | 586              | 282             | 79             | 399              | 461              | 1411               |
|            | 13.04.2019               | <MDL                                                                 | <MDL           | 6.5            | 726              | 311             | 82             | 842              | 980              | 5449               |
|            | 14.04.2019               | <MDL                                                                 | <MDL           | 26             | 960              | 408             | 82             | 914              | 1110             | 12158              |
|            | 15.04.2019               | <MDL                                                                 | <MDL           | 27             | 888              | 337             | 71             | 809              | 926              | 6971               |
|            | 16.04.2019               | <MDL                                                                 | <MDL           | 9.7            | 586              | 255             | 109            | 735              | 824              | 3599               |
|            | <b>Average 2019 ± SD</b> | <b>&lt;MDL</b>                                                       | <b>&lt;MDL</b> | <b>12 ± 10</b> | <b>714 ± 152</b> | <b>313 ± 51</b> | <b>84 ± 12</b> | <b>695 ± 205</b> | <b>807 ± 244</b> | <b>4781 ± 3878</b> |
|            | 26.03.2020               | <MDL                                                                 | <MDL           | 4.7            | 130              | 342             | 79             | 486              | 1073             | 4851               |
|            | 27.03.2020               | <MDL                                                                 | <MDL           | 5.8            | 228              | 450             | 88             | 993              | 1419             | 18738              |
|            | 28.03.2020               | <MDL                                                                 | <MDL           | 4.4            | 85               | 299             | 66             | 1055             | 1563             | 3630               |
|            | 29.03.2020               | <MDL                                                                 | <MDL           | 5.5            | 106              | 352             | 69             | 575              | 1502             | 7000               |
|            | 30.03.2020               | <MDL                                                                 | <MDL           | 0.9            | 40               | 115             | 60             | 239              | 452              | 5658               |
|            | 31.03.2020               | <MDL                                                                 | <MDL           | 1.3            | 19               | 134             | 66             | 524              | 557              | 4034               |
|            | 01.04.2020               | <MDL                                                                 | <MDL           | 1.3            | 77               | 97              | 80             | 242              | 301              | 9705               |
|            | 05.04.2020               | <MDL                                                                 | <MDL           | 5.4            | 283              | 618             | 79             | 412              | 883              | 4746               |
|            | 08.04.2020               | <MDL                                                                 | <MDL           | 9.7            | 112              | 528             | 86             | 291              | 570              | 4881               |
|            | 13.04.2020               | <MDL                                                                 | <MDL           | 6.2            | 94               | 415             | 87             | 461              | 1003             | 8393               |
|            | 16.04.2020               | <MDL                                                                 | <MDL           | 2.9            | 165              | 407             | 76             | 559              | 1257             | 4743               |
|            | 19.04.2020               | <MDL                                                                 | <MDL           | 5.5            | 105              | 406             | 111            | 269              | 483              | 4402               |
|            | 23.04.2020               | <MDL                                                                 | <MDL           | 3.7            | 138              | 506             | 101            | 702              | 1620             | 4317               |
|            | 27.04.2020               | <MDL                                                                 | <MDL           | 3.1            | 84               | 312             | 91             | 332              | 696              | 6509               |
|            | 29.04.2020               | <MDL                                                                 | <MDL           | 2.8            | 210              | 388             | 104            | 361              | 697              | 7558               |
|            | 04.05.2020               | <MDL                                                                 | <MDL           | 2.6            | 109              | 478             | 74             | 450              | 906              | 7409               |
|            | 07.05.2020               | <MDL                                                                 | <MDL           | 1.0            | 120              | 520             | 73             | 407              | 889              | 3937               |
|            | 11.05.2020               | <MDL                                                                 | <MDL           | 2.7            | 125              | 616             | 90             | 320              | 808              | 5039               |
|            | 14.05.2020               | <MDL                                                                 | <MDL           | 1.0            | 60               | 298             | 69             | 245              | 568              | 5076               |
|            | 18.05.2020               | <MDL                                                                 | <MDL           | 1.0            | 96               | 325             | 67             | 486              | 1008             | 6134               |
|            | 21.05.2020               | <MDL                                                                 | <MDL           | 1.0            | 140              | 317             | 67             | 295              | 512              | 5205               |
|            | 25.05.2020               | <MDL                                                                 | <MDL           | 1.0            | 129              | 193             | 56             | 376              | 415              | 2377               |
|            | 28.05.2020               | <MDL                                                                 | <MDL           | 0.9            | 139              | 267             | 65             | 341              | 687              | 3469               |
|            | 01.06.2020               | <MDL                                                                 | <MDL           | 2.0            | 133              | 291             | 54             | 239              | 462              | 5258               |
|            | 04.06.2020               | <MDL                                                                 | <MDL           | 3.7            | 210              | 332             | 55             | 325              | 770              | 3955               |
| 08.06.2020 | <MDL                     | <MDL                                                                 | 4.9            | 43             | 417              | 55              | 529            | 1308             | 6070             |                    |
| 11.06.2020 | <MDL                     | <MDL                                                                 | 1.0            | 89             | 505              | 70              | 376            | 788              | 4102             |                    |
| 15.06.2020 | <MDL                     | <MDL                                                                 | 7.4            | 54             | 505              | 73              | 436            | 1008             | 8572             |                    |
| 18.06.2020 | <MDL                     | <MDL                                                                 | 0.9            | 74             | 438              | 82              | 350            | 835              | 8164             |                    |
| 22.06.2020 | <MDL                     | <MDL                                                                 | 3.9            | 142            | 317              | 67              | 273            | 564              | 7906             |                    |

| City                   | Date (DD.MM.YYYY)        | Excretion loads (mg day <sup>-1</sup> 1000inhabitant <sup>-1</sup> ) |                |                  |                  |                  |                 |                  |                  |                    |
|------------------------|--------------------------|----------------------------------------------------------------------|----------------|------------------|------------------|------------------|-----------------|------------------|------------------|--------------------|
|                        |                          | AMP                                                                  | MAMP           | MDMA             | BE               | COC              | THC-COOH        | COT              | OH-COT           | EtS                |
|                        | 25.06.2020               | < MDL                                                                | < MDL          | 5.4              | 107              | 342              | 61              | 250              | 520              | 5512               |
|                        | 29.06.2020               | < MDL                                                                | < MDL          | 6.7              | 219              | 428              | 115             | 315              | 587              | 14983              |
|                        | 02.07.2020               | < MDL                                                                | < MDL          | 0.8              | 61               | 410              | 69              | 300              | 672              | 12740              |
|                        | 06.07.2020               | < MDL                                                                | < MDL          | 5.0              | 64               | 437              | 72              | 344              | 917              | 5690               |
|                        | 08.07.2020               | < MDL                                                                | < MDL          | 0.9              | 28               | 439              | 66              | 583              | 1518             | 8236               |
|                        | 09.07.2020               | < MDL                                                                | < MDL          | 0.9              | 42               | 480              | 66              | 378              | 822              | 8353               |
|                        | 10.07.2020               | < MDL                                                                | < MDL          | 0.9              | 231              | 411              | 55              | 376              | 757              | 8792               |
|                        | 11.07.2020               | < MDL                                                                | < MDL          | 2.4              | 240              | 391              | 64              | 371              | 706              | 6877               |
|                        | 12.07.2020               | < MDL                                                                | < MDL          | 6.8              | 63               | 491              | 98              | 284              | 763              | 18205              |
|                        | 13.07.2020               | < MDL                                                                | < MDL          | 8.8              | 192              | 426              | 63              | 363              | 836              | 4859               |
|                        | 14.07.2020               | < MDL                                                                | < MDL          | 2.1              | 205              | 382              | 67              | 297              | 801              | 5083               |
|                        | <b>Average 2020 ± SD</b> | <b>&lt;MDL</b>                                                       | <b>&lt;MDL</b> | <b>3.4 ± 2.4</b> | <b>122 ± 65</b>  | <b>386 ± 118</b> | <b>75 ± 15</b>  | <b>410 ± 177</b> | <b>842 ± 335</b> | <b>6858 ± 3619</b> |
|                        | 21.05.2019               | 25                                                                   | < MDL          | 9                | 312              | 192              | 76              | 464              | 574              | 2959               |
|                        | 22.05.2019               | 28                                                                   | < MDL          | 8                | 467              | 200              | 67              | 441              | 558              | 2725               |
|                        | 24.05.2019               | 15                                                                   | < MDL          | 23               | 359              | 283              | 194             | 379              | 449              | 3136               |
|                        | 25.05.2019               | < MDL                                                                | < MDL          | 23               | 692              | 268              | 137             | 540              | 680              | 2969               |
|                        | 26.05.2019               | 17                                                                   | < MDL          | 23               | 643              | 220              | 132             | 579              | 685              | 6169               |
|                        | 27.05.2019               | < MDL                                                                | < MDL          | 12               | 477              | 176              | 152             | 501              | 565              | 4798               |
|                        | 28.05.2019               | 16                                                                   | < MDL          | 8                | 554              | 215              | 105             | 514              | 633              | 4582               |
|                        | <b>Average 2019 ± SD</b> | <b>15 ± 11</b>                                                       | <b>&lt;MDL</b> | <b>15 ± 8</b>    | <b>501 ± 139</b> | <b>222 ± 40</b>  | <b>123 ± 44</b> | <b>488 ± 67</b>  | <b>592 ± 82</b>  | <b>3905 ± 1300</b> |
| Santiago de Compostela | 10.03.2020               | < MDL                                                                | < MDL          | 7.6              | 350              | 174              | 67              | 317              | 624              | 2934               |
|                        | 11.03.2020               | < MDL                                                                | < MDL          | 43               | 481              | 180              | 66              | 264              | 570              | 3664               |
|                        | 12.03.2020               | < MDL                                                                | < MDL          | 309              | 395              | 133              | 64              | 320              | 532              | 3753               |
|                        | 13.03.2020               | < MDL                                                                | < MDL          | 18               | 522              | 191              | 75              | 284              | 492              | 3492               |
|                        | 14.03.2020               | < MDL                                                                | < MDL          | 27               | 488              | 181              | 68              | 282              | 578              | 4210               |
|                        | 07.04.2020               | < MDL                                                                | < MDL          | 6.0              | 379              | 54               | 37              | 292              | 541              | 4955               |
|                        | 13.04.2020               | < MDL                                                                | < MDL          | 14               | 654              | 218              | 59              | 738              | 1154             | 4733               |
|                        | 14.04.2020               | < MDL                                                                | < MDL          | 12               | 396              | 77               | 61              | 400              | 535              | 2977               |
|                        | 19.04.2020               | < MDL                                                                | < MDL          | 7.6              | 358              | 46               | 35              | 244              | 501              | 4086               |
|                        | 21.04.2020               | < MDL                                                                | < MDL          | 4.3              | 434              | 59               | 53              | 349              | 865              | 1957               |
|                        | 25.04.2020               | < MDL                                                                | < MDL          | 10               | 1036             | 145              | 45              | 1279             | 1946             | 7600               |
|                        | 03.05.2020               | < MDL                                                                | < MDL          | 16               | 936              | 195              | 87              | 893              | 1745             | 11416              |
|                        | 04.05.2020               | < MDL                                                                | < MDL          | 28               | 671              | 153              | 53              | 643              | 1474             | 6615               |
|                        | 05.05.2020               | < MDL                                                                | < MDL          | 22               | 421              | 86               | 44              | 331              | 683              | 3787               |
|                        | 10.05.2020               | < MDL                                                                | < MDL          | 7.6              | 496              | 80               | 57              | 468              | 1007             | 3772               |
|                        | 12.05.2020               | < MDL                                                                | < MDL          | 14               | 946              | 181              | 46              | 627              | 1409             | 7317               |
|                        | 17.05.2020               | < MDL                                                                | < MDL          | 40               | 865              | 123              | 74              | 727              | 1225             | 6480               |
| 19.05.2020             | < MDL                    | < MDL                                                                | 39             | 590              | 111              | 49               | 699             | 1035             | 5371             |                    |

| City            | Date (DD.MM.YYYY)        | Excretion loads (mg day <sup>-1</sup> 1000inhabitant <sup>-1</sup> ) |                |                |                  |                 |                |                  |                  |                    |
|-----------------|--------------------------|----------------------------------------------------------------------|----------------|----------------|------------------|-----------------|----------------|------------------|------------------|--------------------|
|                 |                          | AMP                                                                  | MAMP           | MDMA           | BE               | COC             | THC-COOH       | COT              | OH-COT           | EtS                |
|                 | 24.05.2020               | < MDL                                                                | < MDL          | 16             | 490              | 112             | 47             | 457              | 1018             | 5920               |
|                 | 27.05.2020               | < MDL                                                                | < MDL          | 15             | 497              | 181             | 36             | 585              | 817              | 5192               |
|                 | 30.05.2020               | < MDL                                                                | < MDL          | 14             | 616              | 92              | 54             | 709              | 813              | 7108               |
|                 | 02.06.2020               | < MDL                                                                | < MDL          | 19             | 672              | 185             | 42             | 616              | 1434             | 5886               |
|                 | 07.06.2020               | < MDL                                                                | < MDL          | 15             | 504              | 128             | 35             | 582              | 1356             | 4363               |
|                 | 09.06.2020               | < MDL                                                                | < MDL          | 13             | 377              | 108             | 68             | 397              | 750              | 3477               |
|                 | 13.06.2020               | < MDL                                                                | < MDL          | 8.7            | 589              | 153             | 68             | 439              | 589              | 7404               |
|                 | 16.06.2020               | < MDL                                                                | < MDL          | 17             | 550              | 178             | 75             | 399              | 778              | 4388               |
|                 | 20.06.2020               | < MDL                                                                | < MDL          | 8              | 450              | 121             | 52             | 507              | 568              | 4099               |
|                 | 22.06.2020               | < MDL                                                                | < MDL          | 15             | 486              | 157             | 53             | 449              | 598              | 5849               |
|                 | 23.06.2020               | < MDL                                                                | < MDL          | 7.5            | 514              | 92              | 94             | 441              | 675              | 5485               |
|                 | 27.06.2020               | < MDL                                                                | < MDL          | 10             | 675              | 214             | 85             | 527              | 610              | 6017               |
|                 | 30.06.2020               | < MDL                                                                | < MDL          | 13             | 465              | 115             | 66             | 409              | 957              | 4305               |
|                 | 08.07.2020               | < MDL                                                                | < MDL          | 8.6            | 575              | 264             | 85             | 467              | 865              | 6235               |
|                 | 09.07.2020               | < MDL                                                                | < MDL          | 22             | 482              | 220             | 172            | 451              | 669              | 4990               |
|                 | 10.07.2020               | < MDL                                                                | < MDL          | 19             | 535              | 283             | 75             | 477              | 508              | 6752               |
|                 | 11.07.2020               | < MDL                                                                | < MDL          | 21             | 961              | 444             | 82             | 590              | 812              | 10991              |
|                 | 12.07.2020               | < MDL                                                                | < MDL          | 49             | 621              | 280             | 63             | 449              | 429              | 7238               |
|                 | 13.07.2020               | < MDL                                                                | < MDL          | 38             | 529              | 226             | 71             | 418              | 774              | 5786               |
|                 | 14.07.2020               | < MDL                                                                | < MDL          | 29             | 572              | 267             | 96             | 368              | 584              | 5779               |
|                 | <b>Average 2020 ± SD</b> | <b>&lt;MDL</b>                                                       | <b>&lt;MDL</b> | <b>26 ± 19</b> | <b>567 ± 174</b> | <b>163 ± 78</b> | <b>65 ± 24</b> | <b>497 ± 200</b> | <b>856 ± 372</b> | <b>5431 ± 1972</b> |
| Vitoria-Gasteiz | 28.04.2020               | 399                                                                  | <MDL           | 16             | 535              | 154             | 104            | 848              | 1229             | 5766               |
|                 | 29.04.2020               | 369                                                                  | <MDL           | 12             | 475              | 227             | 103            | 1495             | 2102             | 5885               |
|                 | 04.05.2020               | 378                                                                  | <MDL           | 30             | 934              | 492             | 128            | 2313             | 2543             | 11087              |
|                 | 07.05.2020               | 245                                                                  | <MDL           | 17             | 452              | 223             | 91             | 1036             | 1212             | 4311               |
|                 | 11.05.2020               | 426                                                                  | <MDL           | 23             | 685              | 195             | 178            | 956              | 1995             | 9812               |
|                 | 14.05.2020               | 545                                                                  | <MDL           | 27             | 826              | 425             | 36             | 1153             | 1386             | 5734               |
|                 | 18.05.2020               | 319                                                                  | <MDL           | 11             | 530              | 276             | 87             | 477              | 1431             | 6047               |
|                 | 21.05.2020               | 305                                                                  | <MDL           | 7.9            | 612              | 363             | 63             | 726              | 1048             | 4901               |
|                 | 25.05.2020               | 180                                                                  | <MDL           | 25             | 335              | 119             | 62             | 514              | 692              | 4335               |
|                 | 01.06.2020               | 551                                                                  | <MDL           | 34             | 1465             | 697             | 43             | 1930             | 2556             | 11052              |
|                 | 08.06.2020               | 412                                                                  | <MDL           | 22             | 896              | 338             | 64             | 771              | 1517             | 5950               |
|                 | 15.06.2020               | 133                                                                  | <MDL           | 18             | 622              | 258             | 79             | 512              | 1033             | 5125               |
|                 | 22.06.2020               | 411                                                                  | <MDL           | 30             | 967              | 454             | 40             | 804              | 1248             | 9114               |
|                 | 29.06.2020               | 257                                                                  | <MDL           | 36             | 942              | 70              | 17             | 736              | 1804             | 8936               |
|                 | 07.07.2020               | 186                                                                  | <MDL           | 14             | 387              | 152             | 64             | 339              | 445              | 2817               |
| 08.07.2020      | 211                      | <MDL                                                                 | 16             | 376            | 148              | 71              | 464            | 498              | 3075             |                    |
| 09.07.2020      | 241                      | <MDL                                                                 | 14             | 428            | 204              | 77              | 438            | 492              | 3790             |                    |

| City          | Date (DD.MM.YYYY)        | Excretion loads (mg day <sup>-1</sup> 1000inhabitant <sup>-1</sup> ) |                |                |                  |                  |                |                  |                   |                    |
|---------------|--------------------------|----------------------------------------------------------------------|----------------|----------------|------------------|------------------|----------------|------------------|-------------------|--------------------|
|               |                          | AMP                                                                  | MAMP           | MDMA           | BE               | COC              | THC-COOH       | COT              | OH-COT            | EtS                |
|               | 10.07.2020               | 296                                                                  | <MDL           | 14             | 532              | 223              | 56             | 629              | 1119              | 6178               |
|               | 11.07.2020               | 264                                                                  | <MDL           | 12             | 485              | 264              | 34             | 314              | 736               | 4044               |
|               | 12.07.2020               | 516                                                                  | <MDL           | 42             | 1448             | 669              | 84             | 696              | 1064              | 23284              |
|               | 13.07.2020               | 392                                                                  | <MDL           | 27             | 713              | 344              | 94             | 576              | 777               | 11054              |
|               | <b>Average 2020 ± SD</b> | <b>335 ± 120</b>                                                     | <b>&lt;MDL</b> | <b>22 ± 9</b>  | <b>697 ± 320</b> | <b>289 ± 181</b> | <b>75 ± 36</b> | <b>844 ± 513</b> | <b>1282 ± 624</b> | <b>7252 ± 4532</b> |
| Porto         | 19.04.2020               | <MDL                                                                 | <MDL           | 39             | 506              | 82               | 25             | 584              | 714               | 7498               |
|               | 22.04.2020               | <MDL                                                                 | <MDL           | 9.1            | 318              | 97               | 22             | 469              | 609               | 4152               |
|               | 30.04.2020               | <MDL                                                                 | <MDL           | 16             | 307              | 148              | 90             | 451              | 579               | 3726               |
|               | 03.05.2020               | <MDL                                                                 | <MDL           | 22             | 433              | 158              | 117            | 460              | 589               | 5649               |
|               | 06.05.2020               | <MDL                                                                 | <MDL           | 20             | 542              | 468              | 149            | 505              | 656               | 4552               |
|               | 10.05.2020               | <MDL                                                                 | <MDL           | 35             | 530              | 358              | 58             | 429              | 563               | 4613               |
|               | 13.05.2020               | <MDL                                                                 | <MDL           | 16             | 261              | 100              | 77             | 355              | 470               | 2806               |
|               | 17.05.2020               | <MDL                                                                 | <MDL           | 28             | 316              | 102              | 111            | 414              | 494               | 5422               |
|               | 19.05.2020               | <MDL                                                                 | <MDL           | 15             | 322              | 107              | 106            | 455              | 756               | 3527               |
|               | 20.05.2020               | <MDL                                                                 | <MDL           | 17             | 341              | 226              | 67             | 402              | 723               | 4270               |
|               | 21.05.2020               | <MDL                                                                 | <MDL           | 12             | 357              | 219              | 38             | 435              | 777               | 2849               |
|               | 22.05.2020               | <MDL                                                                 | <MDL           | 17             | 321              | 207              | 38             | 377              | 689               | 3585               |
|               | 23.05.2020               | <MDL                                                                 | <MDL           | 28             | 337              | 112              | 71             | 391              | 719               | 7198               |
|               | 24.05.2020               | <MDL                                                                 | <MDL           | 40             | 341              | 80               | 59             | 428              | 915               | 5160               |
|               | 25.05.2020               | <MDL                                                                 | <MDL           | 20             | 290              | 89               | 63             | 419              | 917               | 4195               |
|               | 27.05.2020               | <MDL                                                                 | <MDL           | 15             | 326              | 137              | 42             | 428              | 896               | 4470               |
|               | 31.05.2020               | <MDL                                                                 | <MDL           | 25             | 471              | 182              | 84             | 419              | 906               | 2755               |
|               | 03.06.2020               | <MDL                                                                 | <MDL           | 18             | 410              | 214              | 93             | 425              | 851               | 8224               |
|               | 07.06.2020               | <MDL                                                                 | <MDL           | 31             | 351              | 125              | 111            | 409              | 932               | 5274               |
|               | 11.06.2020               | <MDL                                                                 | <MDL           | 20             | 390              | 107              | 87             | 422              | 882               | 5041               |
|               | 14.06.2020               | <MDL                                                                 | <MDL           | 36             | 422              | 122              | 90             | 400              | 798               | 2592               |
|               | 17.06.2020               | <MDL                                                                 | <MDL           | 18             | 415              | 157              | 121            | 410              | 823               | 3863               |
|               | 21.06.2020               | <MDL                                                                 | <MDL           | 24             | 413              | 109              | 78             | 397              | 801               | 7373               |
|               | 24.06.2020               | <MDL                                                                 | <MDL           | 55             | 430              | 109              | 104            | 380              | 815               | 4202               |
| 28.06.2020    | <MDL                     | <MDL                                                                 | 28             | 360            | 88               | 43               | 401            | 893              | 5814              |                    |
| 01.07.2020    | <MDL                     | <MDL                                                                 | 22             | 371            | 134              | 45               | 486            | 1078             | 7564              |                    |
| 05.07.2020    | <MDL                     | <MDL                                                                 | 37             | 469            | 114              | 40               | 544            | 1158             | 8171              |                    |
| 08.07.2020    | <MDL                     | <MDL                                                                 | 18             | 500            | 377              | 6.6              | 526            | 1080             | 5593              |                    |
| 15.07.2020    | <MDL                     | <MDL                                                                 | 16             | 313            | 141              | 35               | 418            | 874              | 6343              |                    |
| 19.07.2020    | <MDL                     | <MDL                                                                 | 25             | 488            | 87               | 110              | 377            | 864              | 9386              |                    |
| 22.07.2020    | <MDL                     | <MDL                                                                 | 16             | 272            | 213              | 6.5              | 578            | 811              | 3211              |                    |
|               | <b>Average 2020 ± SD</b> | <b>&lt;MDL</b>                                                       | <b>&lt;MDL</b> | <b>24 ± 10</b> | <b>385 ± 78</b>  | <b>160 ± 92</b>  | <b>74 ± 32</b> | <b>438 ± 57</b>  | <b>795 ± 165</b>  | <b>5131 ± 1822</b> |
| Vila do Conde | 22.04.2020               | <MDL                                                                 | <MDL           | 3.9            | 159              | 35               | 19             | 403              | 617               | 4032               |

| City                     | Date (DD.MM.YYYY) | Excretion loads (mg day <sup>-1</sup> 1000inhabitant <sup>-1</sup> ) |                |                |                  |                |                |                  |                  |                    |
|--------------------------|-------------------|----------------------------------------------------------------------|----------------|----------------|------------------|----------------|----------------|------------------|------------------|--------------------|
|                          |                   | AMP                                                                  | MAMP           | MDMA           | BE               | COC            | THC-COOH       | COT              | OH-COT           | EtS                |
|                          | 26.04.2020        | < MDL                                                                | < MDL          | 26             | 219              | 39             | 20             | 376              | 600              | 4567               |
|                          | 29.04.2020        | < MDL                                                                | < MDL          | 4.9            | 138              | 25             | 16             | 273              | 333              | 2952               |
|                          | 03.05.2020        | < MDL                                                                | < MDL          | 27             | 188              | 40             | 16             | 431              | 653              | 6608               |
|                          | 06.05.2020        | < MDL                                                                | < MDL          | 21             | 153              | 31             | 19             | 424              | 627              | 8791               |
|                          | 10.05.2020        | < MDL                                                                | < MDL          | 17             | 181              | 37             | 14             | 306              | 455              | 6522               |
|                          | 13.05.2020        | < MDL                                                                | < MDL          | 5.4            | 186              | 34             | 16             | 387              | 581              | 5644               |
|                          | 17.05.2020        | < MDL                                                                | < MDL          | 24             | 173              | 29             | 12             | 346              | 515              | 6422               |
|                          | 20.05.2020        | < MDL                                                                | < MDL          | 6.9            | 104              | 22             | 13             | 265              | 433              | 3263               |
|                          | 24.05.2020        | < MDL                                                                | < MDL          | 20             | 241              | 45             | 13             | 424              | 647              | 8512               |
|                          | 31.05.2020        | < MDL                                                                | < MDL          | 60             | 631              | 98             | 7              | 825              | 1763             | 12774              |
|                          | 03.06.2020        | < MDL                                                                | < MDL          | 12             | 363              | 73             | 28             | 632              | 1255             | 7420               |
|                          | 07.06.2020        | < MDL                                                                | < MDL          | 32             | 328              | 54             | 5              | 473              | 1011             | 7832               |
|                          | 14.06.2020        | < MDL                                                                | < MDL          | 10             | 120              | 6              | 26             | 317              | 630              | 3765               |
|                          | 17.06.2020        | < MDL                                                                | < MDL          | 8.0            | 218              | 57             | 5              | 456              | 922              | 5633               |
|                          | 21.06.2020        | < MDL                                                                | < MDL          | 7.1            | 68               | 10             | 24             | 184              | 339              | 3155               |
|                          | 23.06.2020        | < MDL                                                                | < MDL          | 10             | 183              | 26             | 26             | 377              | 828              | 4699               |
|                          | 28.06.2020        | < MDL                                                                | < MDL          | 10             | 231              | 37             | 21             | 397              | 885              | 6079               |
|                          | 01.07.2020        | < MDL                                                                | < MDL          | 8.5            | 195              | 47             | 26             | 387              | 848              | 5014               |
|                          | 05.07.2020        | < MDL                                                                | < MDL          | 14             | 313              | 60             | 5              | 452              | 1007             | 7064               |
|                          | 08.07.2020        | < MDL                                                                | < MDL          | 8.2            | 174              | 41             | 50             | 382              | 841              | 4215               |
|                          | 09.07.2020        | < MDL                                                                | < MDL          | 4.6            | 217              | 40             | 37             | 394              | 865              | 6731               |
|                          | 10.07.020         | < MDL                                                                | < MDL          | 3.9            | 94               | 19             | 40             | 194              | 363              | 1761               |
|                          | 11.07.2020        | < MDL                                                                | < MDL          | 8.5            | 267              | 65             | 40             | 485              | 1041             | 4432               |
|                          | 12.07.2020        | < MDL                                                                | < MDL          | 28             | 309              | 144            | 64             | 354              | 732              | 3759               |
| <b>Average 2020 ± SD</b> |                   | <b>&lt;MDL</b>                                                       | <b>&lt;MDL</b> | <b>16 ± 13</b> | <b>218 ± 113</b> | <b>45 ± 29</b> | <b>22 ± 15</b> | <b>398 ± 129</b> | <b>751 ± 318</b> | <b>5665 ± 2349</b> |

**Table S4.** Human consumption calculated from the excretion loads (Table S3) after considering the corresponding CFs. THC: tetrahydrocannabinol, NIC: Nicotine.

| City                                   | Date<br>(DD.MM.YYYY)     | Human consumption (mg day <sup>-1</sup> 1000 inhabitant <sup>-1</sup> ) |                |                |                    |                                 |                                 | Human consumption<br>(L day <sup>-1</sup> 1000inhabitant <sup>-1</sup> ) |         |
|----------------------------------------|--------------------------|-------------------------------------------------------------------------|----------------|----------------|--------------------|---------------------------------|---------------------------------|--------------------------------------------------------------------------|---------|
|                                        |                          | AMP                                                                     | MAMP           | MDMA           | COC from<br>BE     | THC from THC-<br>COOH<br>CF:182 | THC from<br>THC-COOH<br>CF:36.4 | NIC from OH-<br>COT and COT                                              | Ethanol |
| Bilbao and its<br>metropolitan<br>area | 12.06.2019               | 261                                                                     | <MDL           | 23             | 448                | 5254                            | 1051                            |                                                                          |         |
|                                        | 13.06.2019               | 353                                                                     | <MDL           | 18             | 525                | 4361                            | 872                             |                                                                          |         |
|                                        | 14.06.2019               | 655                                                                     | <MDL           | 32             | 2573               | 7366                            | 1473                            |                                                                          |         |
|                                        | 15.06.2019               | 793                                                                     | <MDL           | 35             | 2446               | 5881                            | 1176                            |                                                                          |         |
|                                        | 16.06.2019               | 1118                                                                    | <MDL           | 69             | 4252               | 9365                            | 1873                            |                                                                          |         |
|                                        | 17.06.2019               | 2112                                                                    | <MDL           | 280            | 4815               | 7295                            | 1459                            |                                                                          |         |
|                                        | 18.06.2019               | 1577                                                                    | <MDL           | 157            | 4765               | 8364                            | 1673                            |                                                                          |         |
|                                        | <b>Average 2019 ± SD</b> | <b>981 ± 672</b>                                                        | <b>&lt;MDL</b> | <b>88 ± 97</b> | <b>2832 ± 1867</b> | <b>6841 ± 1768</b>              | <b>1368 ± 354</b>               |                                                                          |         |
|                                        | 13.04.2020               | 732                                                                     | <MDL           | 72             | 1896               | 6280                            | 1256                            | 2599                                                                     | 14.1    |
|                                        | 15.04.2020               | 605                                                                     | <MDL           | 45             | 1506               | 11730                           | 2346                            | 1311                                                                     | 13.3    |
|                                        | 19.04.2020               | 489                                                                     | <MDL           | 69             | 1702               | 10379                           | 2076                            | 1209                                                                     | 14.2    |
|                                        | 22.04.2020               | 388                                                                     | <MDL           | 50             | 987                | 14734                           | 2947                            | 997                                                                      | 20.6    |
|                                        | 26.04.2020               | 399                                                                     | <MDL           | 58             | 1157               | 6538                            | 1308                            | 962                                                                      | 20.8    |
|                                        | 03.05.2020               | 433                                                                     | <MDL           | 61             | 1510               | 10134                           | 2027                            | 1303                                                                     | 16.7    |
|                                        | 06.05.2020               | 922                                                                     | <MDL           | 56             | 2151               | 8683                            | 1737                            | 2662                                                                     | 16.5    |
|                                        | 10.05.2020               | 1225                                                                    | <MDL           | 155            | 3721               | 13372                           | 2674                            | 2899                                                                     | 41.6    |
|                                        | 13.05.2020               | 491                                                                     | <MDL           | 57             | 1467               | 14895                           | 2979                            | 1215                                                                     | 15.5    |
|                                        | 17.05.2020               | 1143                                                                    | <MDL           | 80             | 2632               | 8229                            | 1646                            | 2498                                                                     | 22.9    |
|                                        | 20.05.2020               | 493                                                                     | <MDL           | 41             | 1175               | 12803                           | 2561                            | 1105                                                                     | 16.7    |
|                                        | 24.05.2020               | 744                                                                     | <MDL           | 79             | 2147               | 13978                           | 2796                            | 1252                                                                     | 18.7    |
|                                        | 31.05.2020               | 963                                                                     | <MDL           | 91             | 2237               | 8229                            | 1646                            | 1313                                                                     | 18.9    |
|                                        | 03.06.2020               | 452                                                                     | <MDL           | 40             | 1422               | 5216                            | 1043                            | 819                                                                      | 27.9    |
|                                        | 07.06.2020               | 291                                                                     | <MDL           | 97             | 2325               | 16357                           | 3271                            | 1187                                                                     | 16.5    |
| 10.06.2020                             | 339                      | <MDL                                                                    | 33             | 1019           | 6025               | 1205                            | 793                             | 32.5                                                                     |         |
| 14.06.2020                             | 1337                     | <MDL                                                                    | 133            | 3233           | 7654               | 1531                            | 2738                            | 10.0                                                                     |         |
| 17.06.2020                             | 556                      | <MDL                                                                    | 56             | 1743           | 12765              | 2553                            | 1423                            | 15.4                                                                     |         |
| 21.06.2020                             | 798                      | <MDL                                                                    | 93             | 2184           | 9981               | 1996                            | 2505                            | 18.0                                                                     |         |
| 24.06.2020                             | 1104                     | <MDL                                                                    | 73             | 2017           | 7750               | 1550                            | 2606                            | 42.6                                                                     |         |
| 28.06.2020                             | 763                      | <MDL                                                                    | 114            | 2177           | 5399               | 1080                            | 1569                            | 25.3                                                                     |         |
| 01.07.2020                             | 726                      | <MDL                                                                    | 89             | 2153           | 5728               | 1146                            | 1976                            | 11.6                                                                     |         |
| 08.07.2020                             | 746                      | <MDL                                                                    | 57             | 1841           | 4591               | 918                             | 1373                            | 17.8                                                                     |         |
| 09.07.2020                             | 764                      | <MDL                                                                    | -              | 2081           | 6464               | 1293                            | 1564                            | 22.0                                                                     |         |



| City                     | Date<br>(DD.MM.YYYY)     | Human consumption (mg day <sup>-1</sup> 1000 inhabitant <sup>-1</sup> ) |                |                   |                     |                                 |                                 |                             | Human consumption<br>(L day <sup>-1</sup> 1000inhabitant <sup>-1</sup> ) |
|--------------------------|--------------------------|-------------------------------------------------------------------------|----------------|-------------------|---------------------|---------------------------------|---------------------------------|-----------------------------|--------------------------------------------------------------------------|
|                          |                          | AMP                                                                     | MAMP           | MDMA              | COC from<br>BE      | THC from THC-<br>COOH<br>CF:182 | THC from<br>THC-COOH<br>CF:36.4 | NIC from OH-<br>COT and COT | Ethanol                                                                  |
|                          |                          | 12.07.2020                                                              | 792            | <MDL              | 198                 | 2490                            | 16631                           | 3326                        | 2164                                                                     |
| 13.07.2020               | 590                      | <MDL                                                                    | 196            | 2824              | 25236               | 5047                            | 1496                            | 22.4                        |                                                                          |
| <b>Average 2020 ± SD</b> | <b>703 ± 282</b>         | <b>&lt;MDL</b>                                                          | <b>84 ± 45</b> | <b>1992 ± 656</b> | <b>10376 ± 4772</b> | <b>2075 ± 954</b>               | <b>1674 ± 672</b>               | <b>21.0 ± 8.4</b>           |                                                                          |
| Castellón                | 10.04.2019               | <MDL                                                                    | <MDL           | 30                | 2290                | 15292                           | 3058                            | 1175                        | 4.01                                                                     |
|                          | 11.04.2019               | <MDL                                                                    | <MDL           | 22                | 2216                | 15055                           | 3011                            | 2085                        | 11.0                                                                     |
|                          | 12.04.2019               | <MDL                                                                    | <MDL           | 24                | 2104                | 14409                           | 2882                            | 1117                        | 5.42                                                                     |
|                          | 13.04.2019               | <MDL                                                                    | <MDL           | 28                | 2605                | 14939                           | 2988                            | 2364                        | 21.0                                                                     |
|                          | 14.04.2019               | <MDL                                                                    | <MDL           | 115               | 3447                | 14917                           | 2983                            | 2610                        | 47.0                                                                     |
|                          | 15.04.2019               | <MDL                                                                    | <MDL           | 120               | 3188                | 13000                           | 2600                            | 2257                        | 26.9                                                                     |
|                          | 16.04.2019               | <MDL                                                                    | <MDL           | 43                | 2103                | 19761                           | 3952                            | 2034                        | 13.9                                                                     |
|                          | <b>Average 2019 ± SD</b> | <b>&lt;MDL</b>                                                          | <b>&lt;MDL</b> | <b>54 ± 44</b>    | <b>2565 ± 547</b>   | <b>15339± 2094</b>              | <b>3068± 419</b>                | <b>1949 ± 580</b>           | <b>18.5 ± 15.0</b>                                                       |
|                          | 26.03.2020               | <MDL                                                                    | <MDL           | 21                | 466                 | 14412                           | 2882                            | 1846                        | 18.7                                                                     |
|                          | 27.03.2020               | <MDL                                                                    | <MDL           | 25                | 820                 | 16007                           | 3201                            | 3038                        | 72.4                                                                     |
|                          | 28.03.2020               | <MDL                                                                    | <MDL           | 20                | 307                 | 12022                           | 2404                            | 3279                        | 14.0                                                                     |
|                          | 29.03.2020               | <MDL                                                                    | <MDL           | 24                | 382                 | 12553                           | 2511                            | 2404                        | 27.0                                                                     |
|                          | 30.03.2020               | <MDL                                                                    | <MDL           | 4.0               | 143                 | 10879                           | 2176                            | 836                         | 21.9                                                                     |
|                          | 31.03.2020               | <MDL                                                                    | <MDL           | 5.9               | 70                  | 11969                           | 2394                            | 1421                        | 15.6                                                                     |
|                          | 01.04.2020               | <MDL                                                                    | <MDL           | 5.6               | 276                 | 14489                           | 2898                            | 698                         | 37.5                                                                     |
|                          | 05.04.2020               | <MDL                                                                    | <MDL           | 24                | 1015                | 14452                           | 2890                            | 1540                        | 18.3                                                                     |
|                          | 08.04.2020               | <MDL                                                                    | <MDL           | 43                | 403                 | 15612                           | 3122                            | 1036                        | 18.8                                                                     |
|                          | 13.04.2020               | <MDL                                                                    | <MDL           | 27                | 336                 | 15894                           | 3179                            | 1736                        | 32.4                                                                     |
|                          | 16.04.2020               | <MDL                                                                    | <MDL           | 13                | 591                 | 13919                           | 2784                            | 2145                        | 18.3                                                                     |
|                          | 19.04.2020               | <MDL                                                                    | <MDL           | 24                | 377                 | 20286                           | 4057                            | 916                         | 17.0                                                                     |
|                          | 23.04.2020               | <MDL                                                                    | <MDL           | 16                | 497                 | 18348                           | 3670                            | 2733                        | 16.7                                                                     |
|                          | 27.04.2020               | <MDL                                                                    | <MDL           | 14                | 300                 | 16626                           | 3325                            | 1225                        | 25.1                                                                     |
|                          | 29.04.2020               | <MDL                                                                    | <MDL           | 12                | 753                 | 19001                           | 3800                            | 1277                        | 29.2                                                                     |
|                          | 04.05.2020               | <MDL                                                                    | <MDL           | 11                | 392                 | 13499                           | 2700                            | 1626                        | 28.6                                                                     |
|                          | 07.05.2020               | <MDL                                                                    | <MDL           | 4.3               | 430                 | 13279                           | 2656                            | 1538                        | 15.2                                                                     |
|                          | 11.05.2020               | <MDL                                                                    | <MDL           | 12                | 450                 | 16326                           | 3265                            | 1311                        | 19.5                                                                     |
|                          | 14.05.2020               | <MDL                                                                    | <MDL           | 4.5               | 216                 | 12587                           | 2517                            | 956                         | 19.6                                                                     |
|                          | 18.05.2020               | <MDL                                                                    | <MDL           | 4.6               | 345                 | 12262                           | 2452                            | 1784                        | 23.7                                                                     |
| 21.05.2020               | <MDL                     | <MDL                                                                    | 4.5            | 504               | 12107               | 2421                            | 989                             | 20.1                        |                                                                          |
| 25.05.2020               | <MDL                     | <MDL                                                                    | 4.5            | 464               | 10193               | 2039                            | 1034                            | 9.2                         |                                                                          |
| 28.05.2020               | <MDL                     | <MDL                                                                    | 4.1            | 501               | 11796               | 2359                            | 1234                            | 13.4                        |                                                                          |
| 01.06.2020               | <MDL                     | <MDL                                                                    | 8.9            | 476               | 9868                | 1974                            | 846                             | 20.3                        |                                                                          |

| City                   | Date<br>(DD.MM.YYYY)     | Human consumption (mg day <sup>-1</sup> 1000 inhabitant <sup>-1</sup> ) |                |                |                   |                                 |                                 |                             | Human consumption<br>(L day <sup>-1</sup> 1000inhabitant <sup>-1</sup> ) |
|------------------------|--------------------------|-------------------------------------------------------------------------|----------------|----------------|-------------------|---------------------------------|---------------------------------|-----------------------------|--------------------------------------------------------------------------|
|                        |                          | AMP                                                                     | MAMP           | MDMA           | COC from<br>BE    | THC from THC-<br>COOH<br>CF:182 | THC from<br>THC-COOH<br>CF:36.4 | NIC from OH-<br>COT and COT | Ethanol                                                                  |
|                        |                          |                                                                         |                |                |                   |                                 |                                 |                             |                                                                          |
|                        | 04.06.2020               | < MDL                                                                   | < MDL          | 16             | 754               | 10058                           | 2012                            | 1284                        | 15.3                                                                     |
|                        | 08.06.2020               | < MDL                                                                   | < MDL          | 21             | 155               | 10058                           | 2012                            | 2142                        | 23.4                                                                     |
|                        | 11.06.2020               | < MDL                                                                   | < MDL          | 4.4            | 319               | 12782                           | 2556                            | 1388                        | 15.8                                                                     |
|                        | 15.06.2020               | < MDL                                                                   | < MDL          | 33             | 195               | 13300                           | 2660                            | 1699                        | 33.1                                                                     |
|                        | 18.06.2020               | < MDL                                                                   | < MDL          | 4.0            | 264               | 14885                           | 2977                            | 1387                        | 31.5                                                                     |
|                        | 22.06.2020               | < MDL                                                                   | < MDL          | 17             | 510               | 12223                           | 2445                            | 1001                        | 30.5                                                                     |
|                        | 25.06.2020               | < MDL                                                                   | < MDL          | 24             | 385               | 11178                           | 2236                            | 920                         | 21.3                                                                     |
|                        | 29.06.2020               | < MDL                                                                   | < MDL          | 29             | 785               | 20950                           | 4190                            | 1092                        | 57.9                                                                     |
|                        | 02.07.2020               | < MDL                                                                   | < MDL          | 3.7            | 217               | 12489                           | 2498                            | 1149                        | 49.2                                                                     |
|                        | 06.07.2020               | < MDL                                                                   | < MDL          | 22             | 231               | 13086                           | 2617                            | 1456                        | 22.0                                                                     |
|                        | 08.07.2020               | < MDL                                                                   | < MDL          | 3.9            | 101               | 12065                           | 2413                            | 2433                        | 31.8                                                                     |
|                        | 09.07.2020               | < MDL                                                                   | < MDL          | 4.1            | 150               | 11988                           | 2398                            | 1423                        | 32.3                                                                     |
|                        | 10.07.2020               | < MDL                                                                   | < MDL          | 4.1            | 830               | 9921                            | 1984                            | 1359                        | 34.0                                                                     |
|                        | 11.07.2020               | < MDL                                                                   | < MDL          | 10             | 863               | 11656                           | 2331                            | 1302                        | 26.6                                                                     |
|                        | 12.07.2020               | < MDL                                                                   | < MDL          | 30             | 228               | 17843                           | 3569                            | 1207                        | 70.3                                                                     |
|                        | 13.07.2020               | < MDL                                                                   | < MDL          | 39             | 690               | 11515                           | 2303                            | 1411                        | 18.8                                                                     |
|                        | 14.07.2020               | < MDL                                                                   | < MDL          | 9.2            | 736               | 12279                           | 2456                            | 1265                        | 19.6                                                                     |
|                        | <b>Average 2020 ± SD</b> | <b>&lt;MDL</b>                                                          | <b>&lt;MDL</b> | <b>15 ± 11</b> | <b>437 ± 235</b>  | <b>13577 ± 2806</b>             | <b>2715 ± 561</b>               | <b>1497 ± 594</b>           | <b>26.5 ± 14.0</b>                                                       |
|                        | 21.05.2019               | 70                                                                      | < MDL          | 38             | 1122              | 18588                           | 3718                            | 1336                        | 11.4                                                                     |
|                        | 22.05.2019               | 78                                                                      | < MDL          | 35             | 1675              | 31836                           | 6367                            | 1280                        | 10.5                                                                     |
|                        | 24.05.2019               | 42                                                                      | < MDL          | 99             | 1291              | 28691                           | 5738                            | 1071                        | 12.1                                                                     |
|                        | 25.05.2019               | < MDL                                                                   | < MDL          | 102            | 2483              | 14453                           | 2891                            | 1565                        | 11.5                                                                     |
|                        | 26.05.2019               | 47                                                                      | < MDL          | 102            | 2308              | 14426                           | 2885                            | 1636                        | 23.8                                                                     |
|                        | 27.05.2019               | < MDL                                                                   | < MDL          | 52             | 1713              | 23978                           | 4796                            | 1389                        | 18.5                                                                     |
|                        | 28.05.2019               | 45                                                                      | < MDL          | 33             | 1987              | 20979                           | 4196                            | 1476                        | 17.7                                                                     |
|                        | <b>Average 2019 ± SD</b> | <b>57 ± 16</b>                                                          | <b>&lt;MDL</b> | <b>64 ± 34</b> | <b>1797 ± 500</b> | <b>21850 ± 6737</b>             | <b>4370 ± 1347</b>              | <b>1393 ± 190</b>           | <b>15.1 ± 5.0</b>                                                        |
| Santiago de Compostela | 10.03.2020               | < MDL                                                                   | < MDL          | 33             | 1256              | 12212                           | 2442                            | 1132                        | 11.3                                                                     |
|                        | 11.03.2020               | < MDL                                                                   | < MDL          | 189            | 1725              | 12001                           | 2400                            | 990                         | 14.1                                                                     |
|                        | 12.03.2020               | < MDL                                                                   | < MDL          | -              | 1417              | 11598                           | 2320                            | 1050                        | 14.5                                                                     |
|                        | 13.03.2020               | < MDL                                                                   | < MDL          | 80             | 1873              | 13593                           | 2719                            | 950                         | 13.5                                                                     |
|                        | 14.03.2020               | < MDL                                                                   | < MDL          | 117            | 1751              | 12391                           | 2478                            | 1029                        | 16.3                                                                     |
|                        | 07.04.2020               | < MDL                                                                   | < MDL          | 26             | 1362              | 6759                            | 1352                            | 1011                        | 19.1                                                                     |
|                        | 13.04.2020               | < MDL                                                                   | < MDL          | 63             | 2347              | 10796                           | 2159                            | 2352                        | 18.3                                                                     |
|                        | 14.04.2020               | < MDL                                                                   | < MDL          | 53             | 1421              | 11174                           | 2235                            | 1188                        | 11.5                                                                     |
|                        | 19.04.2020               | < MDL                                                                   | < MDL          | 19             | 1286              | 6403                            | 1281                            | 891                         | 15.8                                                                     |

| City                     | Date<br>(DD.MM.YYYY) | Human consumption (mg day <sup>-1</sup> 1000 inhabitant <sup>-1</sup> ) |                |                |                   |                                 |                                 |                             | Human consumption<br>(L day <sup>-1</sup> 1000inhabitant <sup>-1</sup> ) |
|--------------------------|----------------------|-------------------------------------------------------------------------|----------------|----------------|-------------------|---------------------------------|---------------------------------|-----------------------------|--------------------------------------------------------------------------|
|                          |                      | AMP                                                                     | MAMP           | MDMA           | COC from<br>BE    | THC from THC-<br>COOH<br>CF:182 | THC from<br>THC-COOH<br>CF:36.4 | NIC from OH-<br>COT and COT | Ethanol                                                                  |
|                          |                      | 21.04.2020                                                              | < MDL          | < MDL          | 45                | 1558                            | 9711                            | 1942                        | 1416                                                                     |
| 25.04.2020               | < MDL                | < MDL                                                                   | 72             | 3718           | 8113              | 1623                            | 4025                            | 29.4                        |                                                                          |
| 03.05.2020               | < MDL                | < MDL                                                                   | 123            | 3362           | 15913             | 3183                            | 3177                            | 44.1                        |                                                                          |
| 04.05.2020               | < MDL                | < MDL                                                                   | 99             | 2409           | 9703              | 1941                            | 2493                            | 25.5                        |                                                                          |
| 05.05.2020               | < MDL                | < MDL                                                                   | 33             | 1511           | 8048              | 1610                            | 1212                            | 14.6                        |                                                                          |
| 10.05.2020               | < MDL                | < MDL                                                                   | 64             | 1781           | 10284             | 2057                            | 1752                            | 14.6                        |                                                                          |
| 12.05.2020               | < MDL                | < MDL                                                                   | 175            | 3396           | 8419              | 1684                            | 2404                            | 28.3                        |                                                                          |
| 17.05.2020               | < MDL                | < MDL                                                                   | 170            | 3105           | 13393             | 2679                            | 2401                            | 25.0                        |                                                                          |
| 19.05.2020               | < MDL                | < MDL                                                                   | 72             | 2119           | 8977              | 1795                            | 2173                            | 20.7                        |                                                                          |
| 24.05.2020               | < MDL                | < MDL                                                                   | 67             | 1759           | 8511              | 1702                            | 1745                            | 22.9                        |                                                                          |
| 27.05.2020               | < MDL                | < MDL                                                                   | 62             | 1786           | 6488              | 1298                            | 1771                            | 20.1                        |                                                                          |
| 30.05.2020               | < MDL                | < MDL                                                                   | 82             | 2211           | 9812              | 1962                            | 1979                            | 27.4                        |                                                                          |
| 02.06.2020               | < MDL                | < MDL                                                                   | 66             | 2413           | 7710              | 1542                            | 2409                            | 22.7                        |                                                                          |
| 07.06.2020               | < MDL                | < MDL                                                                   | 56             | 1811           | 6352              | 1270                            | 2278                            | 16.8                        |                                                                          |
| 09.06.2020               | < MDL                | < MDL                                                                   | 38             | 1354           | 12424             | 2485                            | 1387                            | 13.4                        |                                                                          |
| 13.06.2020               | < MDL                | < MDL                                                                   | 76             | 2114           | 12316             | 2463                            | 1306                            | 28.6                        |                                                                          |
| 16.06.2020               | < MDL                | < MDL                                                                   | 33             | 1974           | 13703             | 2741                            | 1417                            | 16.9                        |                                                                          |
| 20.06.2020               | < MDL                | < MDL                                                                   | 66             | 1616           | 9422              | 1884                            | 1403                            | 15.8                        |                                                                          |
| 22.06.2020               | < MDL                | < MDL                                                                   | 38             | 1744           | 9734              | 1947                            | 1333                            | 22.6                        |                                                                          |
| 23.06.2020               | < MDL                | < MDL                                                                   | 43             | 1844           | 17147             | 3429                            | 1392                            | 21.2                        |                                                                          |
| 27.06.2020               | < MDL                | < MDL                                                                   | 57             | 2424           | 15471             | 3094                            | 1477                            | 23.2                        |                                                                          |
| 30.06.2020               | < MDL                | < MDL                                                                   | 38             | 1668           | 12003             | 2401                            | 1605                            | 16.6                        |                                                                          |
| 08.07.2020               | < MDL                | < MDL                                                                   | 96             | 2065           | 15551             | 3110                            | 1616                            | 24.1                        |                                                                          |
| 09.07.2020               | < MDL                | < MDL                                                                   | 84             | 1729           | 31377             | 6275                            | 1403                            | 19.3                        |                                                                          |
| 10.07.2020               | < MDL                | < MDL                                                                   | 91             | 1922           | 13569             | 2714                            | 1294                            | 26.1                        |                                                                          |
| 11.07.2020               | < MDL                | < MDL                                                                   | 215            | 3451           | 14980             | 2996                            | 1776                            | 42.4                        |                                                                          |
| 12.07.2020               | < MDL                | < MDL                                                                   | 167            | 2230           | 11553             | 2311                            | 1172                            | 28.0                        |                                                                          |
| 13.07.2020               | < MDL                | < MDL                                                                   | 128            | 1898           | 12953             | 2591                            | 1447                            | 22.3                        |                                                                          |
| 14.07.2020               | < MDL                | < MDL                                                                   | 133            | 2054           | 17403             | 3481                            | 1181                            | 22.3                        |                                                                          |
| <b>Average 2020 ± SD</b> |                      | <b>&lt;MDL</b>                                                          | <b>&lt;MDL</b> | <b>83 ± 49</b> | <b>2039 ± 628</b> | <b>11789 ± 4431</b>             | <b>2358 ± 886</b>               | <b>1659 ± 663</b>           | <b>21.0 ± 7.6</b>                                                        |
| Vitoria-<br>Gasteiz      | 28.04.2020           | 1104                                                                    | <MDL           | 70             | 1919              | 18972                           | 3794                            | 2610                        | 22.3                                                                     |
|                          | 29.04.2020           | 1021                                                                    | <MDL           | 53             | 1704              | 18707                           | 3741                            | 4541                        | 22.7                                                                     |
|                          | 04.05.2020           | 1048                                                                    | <MDL           | 131            | 3355              | 23263                           | 4653                            | 6354                        | 42.8                                                                     |
|                          | 07.05.2020           | 678                                                                     | <MDL           | 73             | 1623              | 16649                           | 3330                            | 2914                        | 16.7                                                                     |
|                          | 11.05.2020           | 1181                                                                    | <MDL           | 102            | 2459              | 32392                           | 6478                            | 3521                        | 37.9                                                                     |

| City                     | Date<br>(DD.MM.YYYY) | Human consumption (mg day <sup>-1</sup> 1000 inhabitant <sup>-1</sup> ) |                |                |                    |                                 |                                 |                             | Human consumption<br>(L day <sup>-1</sup> 1000inhabitant <sup>-1</sup> ) |
|--------------------------|----------------------|-------------------------------------------------------------------------|----------------|----------------|--------------------|---------------------------------|---------------------------------|-----------------------------|--------------------------------------------------------------------------|
|                          |                      | AMP                                                                     | MAMP           | MDMA           | COC from<br>BE     | THC from THC-<br>COOH<br>CF:182 | THC from<br>THC-COOH<br>CF:36.4 | NIC from OH-<br>COT and COT | Ethanol                                                                  |
|                          |                      | 14.05.2020                                                              | 1509           | <MDL           | 119                | 2965                            | 6489                            | 1298                        | 3279                                                                     |
| 18.05.2020               | 885                  | <MDL                                                                    | 50             | 1904           | 15866              | 3173                            | 2169                            | 23.4                        |                                                                          |
| 21.05.2020               | 845                  | <MDL                                                                    | 35             | 2196           | 11394              | 2279                            | 2230                            | 18.9                        |                                                                          |
| 25.05.2020               | 498                  | <MDL                                                                    | 108            | 1204           | 11322              | 2264                            | 1532                            | 16.7                        |                                                                          |
| 01.06.2020               | 1527                 | <MDL                                                                    | 148            | 5260           | 7822               | 1564                            | 5713                            | 42.7                        |                                                                          |
| 08.06.2020               | 1141                 | <MDL                                                                    | 97             | 3217           | 11633              | 2327                            | 2752                            | 23.0                        |                                                                          |
| 15.06.2020               | 368                  | <MDL                                                                    | 80             | 2232           | 14447              | 2889                            | 1852                            | 19.8                        |                                                                          |
| 22.06.2020               | 1137                 | <MDL                                                                    | 132            | 3471           | 7248               | 1450                            | 2553                            | 35.2                        |                                                                          |
| 29.06.2020               | 712                  | <MDL                                                                    | 159            | 3383           | 3133               | 627                             | 2965                            | 34.5                        |                                                                          |
| 07.07.2020               | 515                  | <MDL                                                                    | 63             | 1389           | 11666              | 2333                            | 1000                            | 10.9                        |                                                                          |
| 08.07.2020               | 585                  | <MDL                                                                    | 68             | 1350           | 12959              | 2592                            | 1263                            | 11.9                        |                                                                          |
| 09.07.2020               | 667                  | <MDL                                                                    | 60             | 1538           | 14100              | 2820                            | 1214                            | 14.6                        |                                                                          |
| 10.07.2020               | 821                  | <MDL                                                                    | 61             | 1909           | 10172              | 2034                            | 2133                            | 23.9                        |                                                                          |
| 11.07.2020               | 733                  | <MDL                                                                    | 53             | 1740           | 6103               | 1221                            | 1233                            | 15.6                        |                                                                          |
| 12.07.2020               | 1429                 | <MDL                                                                    | 185            | 5200           | 15211              | 3042                            | 2195                            | 89.9                        |                                                                          |
| 13.07.2020               | 1086                 | <MDL                                                                    | 120            | 2559           | 17093              | 3419                            | 1717                            | 42.7                        |                                                                          |
| <b>Average 2020 ± SD</b> |                      | <b>928 ± 331</b>                                                        | <b>&lt;MDL</b> | <b>94 ± 41</b> | <b>2503 ± 1150</b> | <b>13650 ± 6525</b>             | <b>2730 ± 1305</b>              | <b>2654 ± 1421</b>          | <b>28.0 ± 17.5</b>                                                       |
| Porto                    | 19.04.2020           | <MDL                                                                    | <MDL           | 174            | 1815               | 4557                            | 911                             | 1672                        | 29.0                                                                     |
|                          | 22.04.2020           | <MDL                                                                    | <MDL           | 40             | 1143               | 4036                            | 807                             | 1378                        | 16.0                                                                     |
|                          | 30.04.2020           | <MDL                                                                    | <MDL           | 72             | 1104               | 16333                           | 3267                            | 1317                        | 14.4                                                                     |
|                          | 03.05.2020           | <MDL                                                                    | <MDL           | 97             | 1553               | 21225                           | 4245                            | 1342                        | 21.8                                                                     |
|                          | 06.05.2020           | <MDL                                                                    | <MDL           | 86             | 1944               | 27181                           | 5436                            | 1483                        | 17.6                                                                     |
|                          | 10.05.2020           | <MDL                                                                    | <MDL           | 156            | 1904               | 10600                           | 2120                            | 1266                        | 17.8                                                                     |
|                          | 13.05.2020           | <MDL                                                                    | <MDL           | 71             | 936                | 13976                           | 2795                            | 1050                        | 10.8                                                                     |
|                          | 17.05.2020           | <MDL                                                                    | <MDL           | 122            | 1134               | 20252                           | 4050                            | 1174                        | 20.9                                                                     |
|                          | 19.05.2020           | <MDL                                                                    | <MDL           | 66             | 1157               | 19371                           | 3874                            | 1492                        | 13.6                                                                     |
|                          | 20.05.2020           | <MDL                                                                    | <MDL           | 73             | 1224               | 12227                           | 2445                            | 1371                        | 16.5                                                                     |
|                          | 21.05.2020           | <MDL                                                                    | <MDL           | 52             | 1280               | 6953                            | 1391                            | 1479                        | 11.0                                                                     |
|                          | 22.05.2020           | <MDL                                                                    | <MDL           | 76             | 1153               | 6873                            | 1375                            | 1296                        | 13.8                                                                     |
|                          | 23.05.2020           | <MDL                                                                    | <MDL           | 125            | 1209               | 12853                           | 2571                            | 1348                        | 27.8                                                                     |
|                          | 24.05.2020           | <MDL                                                                    | <MDL           | 178            | 1223               | 10699                           | 2140                            | 1597                        | 19.9                                                                     |
|                          | 25.05.2020           | <MDL                                                                    | <MDL           | 87             | 1043               | 11554                           | 2311                            | 1584                        | 16.2                                                                     |
|                          | 27.05.2020           | <MDL                                                                    | <MDL           | 67             | 1170               | 7664                            | 1533                            | 1578                        | 17.3                                                                     |
| 31.05.2020               | <MDL                 | <MDL                                                                    | 111            | 1692           | 15379              | 3076                            | 1573                            | 10.6                        |                                                                          |
| 03.06.2020               | <MDL                 | <MDL                                                                    | 80             | 1473           | 16906              | 3381                            | 1532                            | 31.8                        |                                                                          |

| City                     | Date<br>(DD.MM.YYYY) | Human consumption (mg day <sup>-1</sup> 1000 inhabitant <sup>-1</sup> ) |                |                 |                   |                                 |                                 |                             | Human consumption<br>(L day <sup>-1</sup> 1000inhabitant <sup>-1</sup> ) |
|--------------------------|----------------------|-------------------------------------------------------------------------|----------------|-----------------|-------------------|---------------------------------|---------------------------------|-----------------------------|--------------------------------------------------------------------------|
|                          |                      | AMP                                                                     | MAMP           | MDMA            | COC from<br>BE    | THC from THC-<br>COOH<br>CF:182 | THC from<br>THC-COOH<br>CF:36.4 | NIC from OH-<br>COT and COT | Ethanol                                                                  |
|                          |                      | 07.06.2020                                                              | < MDL          | < MDL           | 138               | 1259                            | 20250                           | 4050                        | 1580                                                                     |
| 11.06.2020               | < MDL                | < MDL                                                                   | 90             | 1398            | 15800             | 3160                            | 1556                            | 19.5                        |                                                                          |
| 14.06.2020               | < MDL                | < MDL                                                                   | 160            | 1515            | 16459             | 3292                            | 1439                            | 10.0                        |                                                                          |
| 17.06.2020               | < MDL                | < MDL                                                                   | 78             | 1489            | 22073             | 4415                            | 1479                            | 14.9                        |                                                                          |
| 21.06.2020               | < MDL                | < MDL                                                                   | 104            | 1482            | 14135             | 2827                            | 1437                            | 28.5                        |                                                                          |
| 24.06.2020               | < MDL                | < MDL                                                                   | 244            | 1543            | 18953             | 3791                            | 1421                            | 16.2                        |                                                                          |
| 28.06.2020               | < MDL                | < MDL                                                                   | 125            | 1292            | 7910              | 1582                            | 1530                            | 22.5                        |                                                                          |
| 01.07.2020               | < MDL                | < MDL                                                                   | 95             | 1332            | 8175              | 1635                            | 1850                            | 29.2                        |                                                                          |
| 05.07.2020               | < MDL                | < MDL                                                                   | 162            | 1682            | 7228              | 1446                            | 2025                            | 31.6                        |                                                                          |
| 08.07.2020               | < MDL                | < MDL                                                                   | 79             | 1795            | 1194              | 239                             | 1920                            | 21.6                        |                                                                          |
| 15.07.2020               | < MDL                | < MDL                                                                   | 72             | 1123            | 6283              | 1257                            | 1542                            | 24.5                        |                                                                          |
| 19.07.2020               | < MDL                | < MDL                                                                   | 111            | 1753            | 20102             | 4021                            | 1461                            | 36.2                        |                                                                          |
| 22.07.2020               | < MDL                | < MDL                                                                   | 71             | 976             | 1188              | 2379                            | 1754                            | 12.4                        |                                                                          |
| <b>Average 2020 ± SD</b> |                      | <b>&lt;MDL</b>                                                          | <b>&lt;MDL</b> | <b>105 ± 45</b> | <b>1381 ± 282</b> | <b>13546 ± 5846</b>             | <b>2709 ± 1169</b>              | <b>1501 ± 204</b>           | <b>19.8 ± 7.0</b>                                                        |
| Vila do Conde            | 22.04.2020           | < MDL                                                                   | < MDL          | 17              | 571               | 3499                            | 700                             | 1271                        | 15.6                                                                     |
|                          | 26.04.2020           | < MDL                                                                   | < MDL          | 116             | 788               | 3603                            | 721                             | 1210                        | 17.6                                                                     |
|                          | 29.04.2020           | < MDL                                                                   | < MDL          | 22              | 497               | 2893                            | 579                             | 781                         | 11.4                                                                     |
|                          | 03.05.2020           | < MDL                                                                   | < MDL          | 120             | 673               | 2911                            | 582                             | 1353                        | 25.5                                                                     |
|                          | 06.05.2020           | < MDL                                                                   | < MDL          | 92              | 549               | 3542                            | 708                             | 1317                        | 33.9                                                                     |
|                          | 10.05.2020           | < MDL                                                                   | < MDL          | 77              | 651               | 2521                            | 504                             | 954                         | 25.2                                                                     |
|                          | 13.05.2020           | < MDL                                                                   | < MDL          | 24              | 667               | 2919                            | 584                             | 1210                        | 21.8                                                                     |
|                          | 17.05.2020           | < MDL                                                                   | < MDL          | 104             | 622               | 2249                            | 450                             | 1078                        | 24.8                                                                     |
|                          | 20.05.2020           | < MDL                                                                   | < MDL          | 30              | 375               | 2414                            | 483                             | 862                         | 12.6                                                                     |
|                          | 24.05.2020           | < MDL                                                                   | < MDL          | 87              | 864               | 2302                            | 460                             | 1337                        | 32.9                                                                     |
|                          | 31.05.2020           | < MDL                                                                   | < MDL          | 265             | 2267              | 1220                            | 244                             | 3079                        | 49.3                                                                     |
|                          | 03.06.2020           | < MDL                                                                   | < MDL          | 55              | 1305              | 5038                            | 1008                            | 2267                        | 28.7                                                                     |
|                          | 07.06.2020           | < MDL                                                                   | < MDL          | 140             | 1179              | 875                             | 175                             | 1765                        | 30.2                                                                     |
|                          | 14.06.2020           | < MDL                                                                   | < MDL          | 44              | 431               | 4644                            | 929                             | 1138                        | 14.5                                                                     |
|                          | 17.06.2020           | < MDL                                                                   | < MDL          | 35              | 784               | 941                             | 188                             | 1651                        | 21.8                                                                     |
|                          | 21.06.2020           | < MDL                                                                   | < MDL          | 31              | 246               | 4366                            | 873                             | 636                         | 12.2                                                                     |
|                          | 23.06.2020           | < MDL                                                                   | < MDL          | 42              | 656               | 4685                            | 937                             | 1428                        | 18.1                                                                     |
|                          | 28.06.2020           | < MDL                                                                   | < MDL          | 44              | 829               | 3863                            | 773                             | 1516                        | 23.5                                                                     |
|                          | 01.07.2020           | < MDL                                                                   | < MDL          | 37              | 699               | 4647                            | 929                             | 1464                        | 19.4                                                                     |
|                          | 05.07.2020           | < MDL                                                                   | < MDL          | 60              | 1124              | 927                             | 185                             | 1725                        | 27.3                                                                     |
| 08.07.2020               | < MDL                | < MDL                                                                   | 36             | 624             | 9056              | 1811                            | 1449                            | 16.3                        |                                                                          |

| City | Date<br>(DD.MM.YYYY)     | Human consumption (mg day <sup>-1</sup> 1000 inhabitant <sup>-1</sup> ) |                |                |                  |                                 |                                 |                             | Human consumption<br>(L day <sup>-1</sup> 1000inhabitant <sup>-1</sup> ) |
|------|--------------------------|-------------------------------------------------------------------------|----------------|----------------|------------------|---------------------------------|---------------------------------|-----------------------------|--------------------------------------------------------------------------|
|      |                          | AMP                                                                     | MAMP           | MDMA           | COC from<br>BE   | THC from THC-<br>COOH<br>CF:182 | THC from<br>THC-COOH<br>CF:36.4 | NIC from OH-<br>COT and COT | Ethanol                                                                  |
|      | 09.07.2020               | < MDL                                                                   | < MDL          | 20             | 780              | 6819                            | 1364                            | 1492                        | 26.0                                                                     |
|      | 10.07.020                | < MDL                                                                   | < MDL          | 17             | 338              | 7209                            | 1442                            | 674                         | 6.8                                                                      |
|      | 11.07.2020               | < MDL                                                                   | < MDL          | 38             | 959              | 7284                            | 1457                            | 1814                        | 17.1                                                                     |
|      | 12.07.2020               | < MDL                                                                   | < MDL          | 123            | 1111             | 11725                           | 2345                            | 1297                        | 14.5                                                                     |
|      | <b>Average 2020 ± SD</b> | <b>&lt;MDL</b>                                                          | <b>&lt;MDL</b> | <b>67 ± 56</b> | <b>783 ± 407</b> | <b>4086 ± 2644</b>              | <b>817 ± 529</b>                | <b>1391 ± 514</b>           | <b>21.9 ± 9.1</b>                                                        |

**Table S5.** Enantiomeric fractions (EF<sub>R</sub>) determined in the wastewater samples.

| City                             | Date (DD.MM.YYYY) | EF <sub>R</sub> |      |
|----------------------------------|-------------------|-----------------|------|
|                                  |                   | AMP             | MDMA |
| Bilbao and its metropolitan area | 16.04.2020        | 0.58            | 0.65 |
|                                  | 18.05.2020        | 0.57            | 0.55 |
|                                  | 11.06.2020        | 0.55            | 0.56 |
|                                  | 09.07.2020        | 0.52            | 0.51 |
| Castellón                        | 19.04.2020        | <MDL            | 0.60 |
|                                  | 11.05.2020        | <MDL            | 0.64 |
|                                  | 15.06.2020        | <MDL            | 0.69 |
|                                  | 13.07.2020        | <MDL            | 0.67 |
| Santiago de Compostela           | 12.03.2020        | 0.46            | 0.48 |
|                                  | 07.04.2020        | <MQL            | 0.72 |
|                                  | 13.04.2020        | 0.62            | 0.64 |
|                                  | 14.04.2020        | 0.60            | 0.61 |
|                                  | 19.04.2020        | 0.47            | 0.72 |
|                                  | 11.07.2020        | 0.58            | 0.56 |
| Vitoria-Gasteiz                  | 28.04.2020        | 0.53            | 0.64 |
|                                  | 14.05.2020        | 0.51            | 0.67 |
|                                  | 29.06.2020        | 0.54            | 0.62 |
|                                  | 10.07.2020        | 0.51            | 0.59 |
| Porto                            | 20.04.2020        | 0.57            | 0.57 |
|                                  | 23.05.2020        | 0.59            | 0.58 |
|                                  | 12.06.2020        | 0.65            | 0.54 |
|                                  | 20.07.2020        | 0.76            | 0.60 |
| Vila do Conde                    | 22.04.2020        | 0.63            | 0.70 |
|                                  | 06.05.2020        | 0.69            | 0.56 |
|                                  | 03.06.2020        | 0.67            | 0.68 |
|                                  | 12.07.2020        | 0.52            | 0.60 |

**Table S6.** Summary of the statistical significance of the time-period on the evolution of consumption in the different cities. Statistical comparison was first performed by a Kruskal-Wallis test and in case of statistical differences being found, subjected to a Bonferroni post-hoc analysis ( $\alpha=0.05$ ).

|             |                         | Castellón                              | Santiago de Compostela          | Bilbao and its metropolitan area | Vitoria-Gasteiz | Porto                                                | Vila do Conde |
|-------------|-------------------------|----------------------------------------|---------------------------------|----------------------------------|-----------------|------------------------------------------------------|---------------|
| Amphetamine | Kruskal-Wallis p- value | -                                      | -                               | 0.78                             | 0.37            | -                                                    | -             |
|             | Bonferroni test*        | -                                      | -                               | -                                | -               | -                                                    | -             |
| MDMA        | Kruskal-Wallis p- value | 0.0026                                 | 0.20                            | 0.37                             | 0.54            | 0.0021                                               | 0.48          |
|             | Bonferroni test *       | 2019-PI                                | -                               | -                                | -               | 2017-PIII                                            | -             |
| Cocaine     | Kruskal-Wallis p- value | <0.0001                                | 0.0037                          | 0.58                             | 0.95            | <0.0001                                              | 0.71          |
|             | Bonferroni test*        | 2017-LD; 2019-LD;<br>2019-P1I; 2019-NN | -                               | -                                | -               | 2017-PI; 2017-P1I; 2017-<br>P1II; 2017-NN; 2018-P1II | -             |
| THC         | Kruskal-Wallis p- value | 0.0014                                 | <0.0001                         | 0.0017                           | 0.040           | 0.0039                                               | 0.063         |
|             | Bonferroni test*        | 2019-P1I; LD-P1I                       | 2019-LD; 2019-P1I; 2019-<br>P1I | 2018-2019; 2018-NN               | LD-NN           | -                                                    | -             |
| Nicotine    | Kruskal-Wallis p- value | 0.0051                                 | 0.0030                          | 0.0088                           | 0.021           | 0.012                                                | 0.45          |
|             | Bonferroni test*        | 2018-LD; 2018-NN                       | PLD-P1I; PLD-P1I                | 2018-P1I                         | LD-NN           | PI-NN                                                | -             |
| Ethanol     | Kruskal-Wallis p- value | 0.0003                                 | 0.0002                          | 0.59                             | 0.96            | 0.18                                                 | 0.18          |
|             | Bonferroni test*        | 2018-LD; 2018-NN                       | 2018-P1I; 2018-NN               | -                                | -               | -                                                    | -             |

\* The table compiles those pairs of samples where statistical differences were found in the Bonferroni test. Abbreviations: PLD: pre-lockdown; LD: lockdown; P1I: Phase I of lockdown relaxation; P1I: Phase II of lockdown relaxation; P1II: Phase III of lockdown relaxation; NN: New Normal.
